# Supplementary material for: The first synthesis of an isocyanide-functionalized imidazolium salt and transition metal complexes thereof
Source: Royal Society of Chemistry journal article supplement (doi:10.1039/d2dt02119f), 2022-01-01

## Supplementary Information

### First synthesis of an isocyanide-functionalized imidazolium salt and transition metal complexes thereof

Javier Ruiz,\* and María A. Mateo

<sup>a</sup>Departamento de Química Orgánica e Inorgánica, Facultad de Química,  
Universidad de Oviedo, 33006 Oviedo, Spain. E-mail: jruiz@uniovi.es

#### Contents

- Synthesis and characterization of the new compounds.....S2
- NMR spectra of the new compounds.....S6

## Synthesis and characterization of the new compounds

### General Considerations

All reactions and manipulations were performed under an atmosphere of dry nitrogen by standard Schlenk techniques. Solvents were distilled over appropriate drying agents under dry nitrogen before use. The IR spectra were measured with a Perkin-Elmer Spectrum 100 spectrophotometer. Mass spectra were recorded on a Bruker model Impact II (ESI) apparatus. NMR spectra were recorded on Bruker 300 and 400 MHz spectrometers. Coupling constants  $J$  are given in Hz. NMR multiplicities are abbreviated as follows: s = singlet, d = doublet, t = triplet, m = multiplet, br = broad. Chemical shifts of the NMR spectra were referenced to internal SiMe<sub>4</sub> (<sup>1</sup>H and <sup>13</sup>C). Assignments are based on <sup>1</sup>H, <sup>1</sup>H-COSY, <sup>1</sup>H, <sup>13</sup>C-HMBC, <sup>1</sup>H, <sup>13</sup>C-HSQC and DEPT experiments. All reagents were obtained commercially and used without further purification. Satisfactory microanalytical data for most of the compounds could not be obtained. NMR spectra are provided instead.

**Safety Note:** Some synthetic procedures involve the use of thallium(I) hexafluorophosphate (TlPF<sub>6</sub>). Thallium compounds are highly toxic when ingested, inhaled, or absorbed through the skin. Extreme caution should be taken when handling TlPF<sub>6</sub> and thallium-containing waste material.

**Synthesis of compound 2.** To a solution of 4-(1*H*-imidazol-1-yl)aniline (0.32 g, 2 mmol) in CH<sub>2</sub>Cl<sub>2</sub> (15 mL) chloroform (161 μL,  $d = 1.49$  g/mL, 2 mmol), benzyltriethylammonium chloride (5 mg, 0.022 mmol) and aqueous NaOH (0.6 mL, 50%,  $d = 1.51$  g/mL, 22.6 mmol) were added and the mixture stirred for 12 h. The mixture was washed with water (3 x 20 mL) and then the organic layer was dried over anhydrous Na<sub>2</sub>CO<sub>3</sub>. The solvent was removed under reduced pressure and the crude product was purified by column chromatography on silica gel (CH<sub>2</sub>Cl<sub>2</sub>, THF). Evaporation of the THF fraction gave a pale yellow solid corresponding to compound **2**. Yield: 0.260 g (77%). IR (acetone, cm<sup>-1</sup>):  $\nu$ (CN) 2127. <sup>1</sup>H NMR (400 MHz, CD<sub>2</sub>Cl<sub>2</sub>):  $\delta$  7.90 (s, 1H, N<sub>2</sub>CH), 7.56 (d, <sup>3</sup> $J$ (H,H) = 8.7 Hz, 2H, C<sub>6</sub>H<sub>4</sub>), 7.50 (d, <sup>3</sup> $J$ (H,H) = 8.7 Hz, 2H, C<sub>6</sub>H<sub>4</sub>), 7.36 (s, 1H, CH imi), 7.22 (s, 1H, CH imi). <sup>13</sup>C{<sup>1</sup>H} NMR (100.61 MHz, CD<sub>2</sub>Cl<sub>2</sub>): 166.0 (s, CN), 137.8 (s, C C<sub>6</sub>H<sub>4</sub>), 135.4 (s, N<sub>2</sub>CH), 130.9 (s, CH imi), 128.1 (s, CH C<sub>6</sub>H<sub>4</sub>), 125.1 (br, C C<sub>6</sub>H<sub>4</sub>), 121.9 (s, CH C<sub>6</sub>H<sub>4</sub>), 117.9 (s, CH imi). MS (ESI):  $m/z$ : [ $M + H$ ]<sup>+</sup>: calcd for C<sub>10</sub>H<sub>8</sub>N<sub>3</sub>: 170.0718, found: 170.0714.

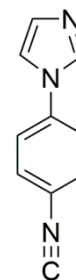

**Synthesis of compound 3.** To a solution of compound **2** (0.26 g, 1.54 mmol) in CH<sub>2</sub>Cl<sub>2</sub> (10 mL) MeI (96 μL,  $d = 2.28$  g/mL, 1.54 mmol) was added. The mixture was refluxed for 3 h giving rise to the formation of a brown precipitate, which was filtered and washed with CH<sub>2</sub>Cl<sub>2</sub>. Yield: 0.39 g (83%). IR (acetonitrile, cm<sup>-1</sup>):  $\nu$ (CN) 2129. <sup>1</sup>H NMR (400 MHz, CD<sub>3</sub>CN):  $\delta$  9.35 (s, 1H, N<sub>2</sub>CH), 7.81 (s, 1H, CH imi), 7.79 (d, <sup>3</sup> $J$ (H,H) = 8.9 Hz, 2H, C<sub>6</sub>H<sub>4</sub>), 7.71 (d, <sup>3</sup> $J$ (H,H) = 8.5 Hz, 2H, C<sub>6</sub>H<sub>4</sub>), 7.60 (s, 1H, CH imi), 3.98 (s, 3H, NCH<sub>3</sub>). <sup>13</sup>C{<sup>1</sup>H} NMR (100.61 MHz, CD<sub>3</sub>CN): 167.9 (s, CN), 136.9 (s, N<sub>2</sub>CH), 136.1 (s, C C<sub>6</sub>H<sub>4</sub>), 129.4 (s, CH C<sub>6</sub>H<sub>4</sub>), 128.3 (s, C C<sub>6</sub>H<sub>4</sub>), 125.6 (s, CH imi), 124.9 (s, CH C<sub>6</sub>H<sub>4</sub>),

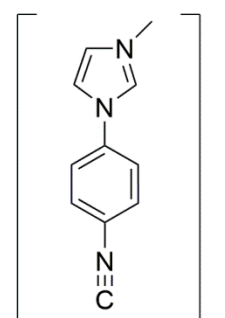

122.4 (s, CH imi), 37.4 (s, NCH<sub>3</sub>). MS (ESI):  $m/z$ :  $[M - I]^+$ : calcd for C<sub>11</sub>H<sub>10</sub>N<sub>3</sub>: 184.0875, found: 184.0875.

**Synthesis of compound 4.** To a solution of compound **3** (0.13 g, 0.418 mmol) in acetonitrile (10 mL) TlPF<sub>6</sub> (146 mg, 0.418 mmol) was added and the mixture stirred for 2 h. A precipitate of TlI was formed and removed by filtration. The solvent of the remaining solution was then evaporated to dryness under vacuum. The remaining residue was washed with hexane (2 x 10 mL) to afford a pale brown solid. Yield: 114 mg (87%). IR (acetone, cm<sup>-1</sup>):  $\nu$ (CN) 2127. <sup>1</sup>H NMR (400 MHz, acetone-d<sub>6</sub>):  $\delta$  9.57 (s, 1H, N<sub>2</sub>CH), 8.23 (t, <sup>3</sup> $J$ (H,H) = <sup>4</sup> $J$ (H,H) = 1.9 Hz, 1H, CH imi), 7.98 (d, <sup>3</sup> $J$ (H,H) = 9.0 Hz, 2H, C<sub>6</sub>H<sub>4</sub>), 7.96 (t, <sup>3</sup> $J$ (H,H) = <sup>4</sup> $J$ (H,H) = 1.7 Hz, 1H, CH imi), 7.86 (d, <sup>3</sup> $J$ (H,H) = 8.9 Hz, 2H, C<sub>6</sub>H<sub>4</sub>), 4.19 (s, 3H, NCH<sub>3</sub>). <sup>13</sup>C{<sup>1</sup>H} NMR (100.61 MHz, acetone-d<sub>6</sub>): 168.6 (s, CN), 137.2 (s, N<sub>2</sub>CH), 136.4 (s, C C<sub>6</sub>H<sub>4</sub>), 129.4 (s, CH C<sub>6</sub>H<sub>4</sub>), 125.9 (s, CH imi), 124.9 (s, CH C<sub>6</sub>H<sub>4</sub>), 122.6 (s, CH imi), 37.2 (s, NCH<sub>3</sub>). MS (ESI):  $m/z$ :  $[M - PF_6]^+$ : calcd for C<sub>11</sub>H<sub>10</sub>N<sub>3</sub>: 184.0875, found 184.0874.

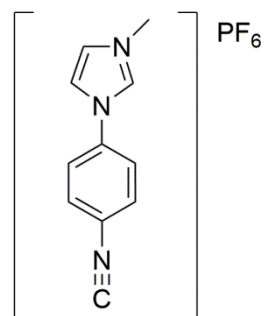

**Synthesis of compound 6.** To a solution of compound **4** (40 mg, 0.12 mmol) in acetonitrile (10 mL) S<sub>8</sub> (4 mg, 0.016 mmol) and LiN(SiMe<sub>3</sub>)<sub>2</sub> (1 M in hexane, 134  $\mu$ L, 0.13 mmol) were added successively. The mixture was stirred for 1 h at -20° C and 30 min at room temperature. The solvent was removed under reduce pressure. The residue was extracted with CH<sub>2</sub>Cl<sub>2</sub> and the resulting solution filtered and then evaporated to dryness under vacuum to afford a pale yellow solid. Crystals of **6** suitable for X-ray analysis were obtained by slow diffusion of hexane into a solution of the compound in dichlorometane. Yield: 20 mg (77%). IR (CH<sub>2</sub>Cl<sub>2</sub>, cm<sup>-1</sup>):  $\nu$ (CN) 2129. <sup>1</sup>H NMR (400 MHz, CD<sub>2</sub>Cl<sub>2</sub>):  $\delta$  7.71 (d, <sup>3</sup> $J$ (H,H) = 8.8 Hz, 2H, C<sub>6</sub>H<sub>4</sub>), 7.50 (d, <sup>3</sup> $J$ (H,H) = 8.7 Hz, 2H, C<sub>6</sub>H<sub>4</sub>), 6.89 (d, <sup>3</sup> $J$ (H,H) = 2.5 Hz, 1H, CH imi), 6.86 (d, <sup>3</sup> $J$ (H,H) = 2.5 Hz, 1H, CH imi), 3.61 (s, 3H, NCH<sub>3</sub>). <sup>13</sup>C{<sup>1</sup>H} NMR (100.61 MHz, CD<sub>2</sub>Cl<sub>2</sub>): 166.4 (s, CN), 164.5 (s, C=S), 139.6 (s, C C<sub>6</sub>H<sub>4</sub>), 127.6 (s, CH C<sub>6</sub>H<sub>4</sub>), 127.5 (s, CH C<sub>6</sub>H<sub>4</sub>), 126.3 (a, C C<sub>6</sub>H<sub>4</sub>), 119.6 (s, CH imi), 117.4 (s, CH imi), 35.8 (s, NCH<sub>3</sub>). MS (ESI):  $m/z$ :  $[M + H]^+$ : calcd for C<sub>11</sub>H<sub>10</sub>N<sub>3</sub>S: 216.0595, found: 216.0589.

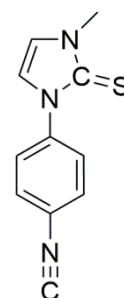

**Synthesis of compound 7.** To a suspension of [AuCl(SMe<sub>2</sub>)] (22 mg, 0.075 mmol) in acetone (5 mL) compound **4** (25 mg, 0.075 mmol) was added and the mixture stirred for 15 min. The solution was then filtered and the solvent evaporated to dryness under vacuum. The remaining residue was washed with hexane (2 x 10 mL) to obtain an orange solid. Orange crystals of **7** suitable for X-ray analysis were obtained by slow diffusion of hexane into an acetone solution of the compound. Yield: 37 mg (86%). IR (acetone, cm<sup>-1</sup>):  $\nu$ (CN) 2228. <sup>1</sup>H NMR (400 MHz, acetone-d<sub>6</sub>):  $\delta$  9.68 (s, 1H, N<sub>2</sub>CH), 8.31 (t, <sup>3</sup> $J$ (H,H) = <sup>4</sup> $J$ (H,H) = 1.9 Hz, 1H, CH imi), 8.22 (d, <sup>3</sup> $J$ (H,H) = 9.0 Hz, 2H, C<sub>6</sub>H<sub>4</sub>), 8.13 (d, <sup>3</sup> $J$ (H,H) = 9.1 Hz, 2H, C<sub>6</sub>H<sub>4</sub>), 8.01 (t, <sup>3</sup> $J$ (H,H) = <sup>4</sup> $J$ (H,H) = 1.8 Hz, 1H, CH imi), 4.22 (s, 3H, NCH<sub>3</sub>). <sup>13</sup>C{<sup>1</sup>H} NMR (100.61 MHz, acetone-d<sub>6</sub>): 138.1 (s, C C<sub>6</sub>H<sub>4</sub>), 137.5 (s,

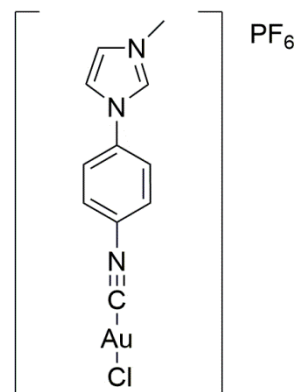

N<sub>2</sub>CH), 130.7 (s, CH C<sub>6</sub>H<sub>4</sub>), 126.1 (s, CH imi), 125.9 (s, C C<sub>6</sub>H<sub>4</sub>), 125.2 (s, CH C<sub>6</sub>H<sub>4</sub>), 122.7 (CH imi), 37.4 (s, NCH<sub>3</sub>). MS (ESI):  $m/z$ : [ $M - PF_6$ ]<sup>+</sup>: calcd for C<sub>11</sub>H<sub>10</sub>AuClN<sub>3</sub>: 416.0229, found: 416.0226.

**Synthesis of compound 8.** To a solution of [Pd(C<sub>3</sub>H<sub>5</sub>)Cl]<sub>2</sub> (17 mg, 0.046 mmol) in acetone (7 ml) compound 4 (30 mg, 0.091 mmol) was added and the mixture stirred for 5 min. The solvent was evaporated to dryness under vacuum. The remaining residue was washed with hexane (2 x 10 mL) to obtain an orange solid. Yield: 32 mg (68%). IR (acetone, cm<sup>-1</sup>):  $\nu$ (CN) 2181. <sup>1</sup>H NMR (400 MHz, acetone-d<sub>6</sub>, -40° C):  $\delta$  9.75 (s, 1H, N<sub>2</sub>CH), 8.35 (s, 1H, CH imi), 8.10–8.08 (m, 4H, C<sub>6</sub>H<sub>4</sub>), 8.03 (s, 1H, CH imi), 5.72 (br, 1H, CH allyl), 4.43 (d, <sup>3</sup> $J$ (H,H) = 5.6 Hz, 1H, *syn, trans*-Cl), 4.33 (d, <sup>3</sup> $J$ (H,H) = 6.6 Hz, 1H, *syn, trans*-CN), 4.18 (s, 3H, NCH<sub>3</sub>), 3.43 (d, <sup>3</sup> $J$ (H,H) = 13.3 Hz, 1H, *anti, trans*-CN), 3.13 (d, <sup>3</sup> $J$ (H,H) = 12.3 Hz, 1H, *anti, trans*-Cl). <sup>13</sup>C{<sup>1</sup>H} NMR (100.61 MHz, acetone-d<sub>6</sub>, -40° C): 148.4 (s, CN), 137.0 (s, N<sub>2</sub>CH), 136.9 (s, C C<sub>6</sub>H<sub>4</sub>), 129.6 (s, CH C<sub>6</sub>H<sub>4</sub>), 127.5 (s, C C<sub>6</sub>H<sub>4</sub>), 125.6 (s, CH imi), 124.5 (s, CH C<sub>6</sub>H<sub>4</sub>), 122.1 (s, CH imi), 119.3 (s, CH allyl), 74.9 (s, CH<sub>2</sub> allyl, *trans*-CN), 61.0 (s, CH<sub>2</sub> allyl, *trans*-Cl), 36.9 (s, NCH<sub>3</sub>). MS (ESI):  $m/z$ : [ $M - PF_6$ ]<sup>+</sup>: calcd for C<sub>14</sub>H<sub>15</sub>ClN<sub>3</sub>Pd: 365.9989, found: 365.9984.

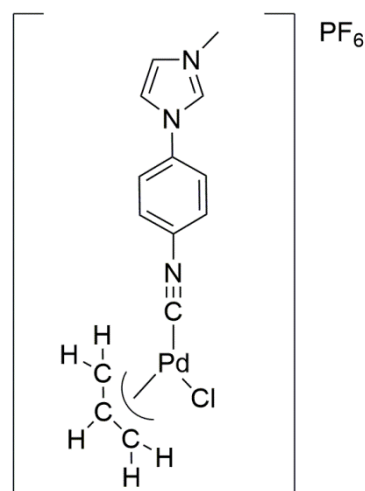

**Synthesis of compound 9.** To a solution of *fac*-[MnBr(bipy)(CO)<sub>3</sub>] (30 mg, 0.08 mmol) in acetone (5 mL) compound 4 (26 mg, 0.08 mmol) and TIPF<sub>6</sub> (28 mg, 0.08 mmol) were added successively. The mixture was vigorously stirred for 8 h. The solution was then filtered and the solvent eliminated to dryness under vacuum. The remaining residue was washed with hexane (2 x 10 mL) to obtain an orange solid. Yield: 52 mg (85%). IR (acetone, cm<sup>-1</sup>):  $\nu$ (CN) 2176 (m);  $\nu$ (CO) 2050 (vs), 1990 (s), 1956 (s). <sup>1</sup>H NMR (400 MHz, acetone-d<sub>6</sub>):  $\delta$  9.44 (s, 1H, N<sub>2</sub>CH), 9.28 (d, <sup>3</sup> $J$ (H,H) = 4.1 Hz, 2H, bipy), 8.71 (d, <sup>3</sup> $J$ (H,H) = 7.5 Hz, 2H, bipy), 8.38 (t, <sup>3</sup> $J$ (H,H) = 7.0 Hz, 2H, bipy), 8.12 (s, 1H, CH imi), 7.89–7.88 (m, 5H, CH imi, bipy, C<sub>6</sub>H<sub>4</sub>), 7.73 (d, <sup>3</sup> $J$ (H,H) = 8.1 Hz, 2H, C<sub>6</sub>H<sub>4</sub>), 4.13 (s, 3H, NCH<sub>3</sub>). <sup>13</sup>C{<sup>1</sup>H} NMR (100.61 MHz, acetone-d<sub>6</sub>):  $\delta$  217.8 (s, CO), 211.5 (s, CO), 167.6 (s, CN), 156.7 (s, C bipy), 155.6 (s, CH bipy), 141.1 (s, CH bipy), 137.0 (s, N<sub>2</sub>CH), 136.8 (s, C C<sub>6</sub>H<sub>4</sub>), 129.9 (s, CH C<sub>6</sub>H<sub>4</sub>), 128.7 (s, CH bipy), 128.5 (s, C C<sub>6</sub>H<sub>4</sub>), 125.8 (s, CH imi), 124.8 (s, CH C<sub>6</sub>H<sub>4</sub>), 124.6 (s, CH bipy), 122.3 (s, CH imi), 37.1 (s, NCH<sub>3</sub>). MS (ESI):  $m/z$ : [ $M - H - 2PF_6$ ]<sup>+</sup>: calcd for C<sub>24</sub>H<sub>17</sub>MnN<sub>5</sub>O<sub>3</sub>: 478.0712, found: 478.0714.

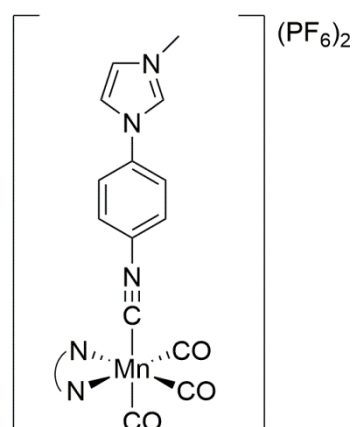

**Synthesis of compound 10.** To a solution of compound **4** (40 mg, 0.12 mmol) in acetone (8 mL) CuI (23 mg, 0.12 mmol) was carefully added and the resulting suspension stirred for 24 h. A brown precipitate was formed. The solution was filtered and then the solvent was removed under reduced pressure to afford an orange solid. Orange crystals of **12** suitable for X-ray diffraction were obtained by slow diffusion of diethyl ether into an acetone solution of the compound. Yield: 18 mg (42%). IR (acetone,  $\text{cm}^{-1}$ ):  $\nu(\text{CN})$  2172.  $^1\text{H}$  NMR (400 MHz, acetone- $d_6$ ):  $\delta$  9.47 (s, 1H,  $\text{N}_2\text{CH}$ ), 8.15 (s, 1H, CH imi), 7.99–7.92 (m, 5H,  $\text{C}_6\text{H}_4$  y CH imi), 4.16 (s, 3H,  $\text{NCH}_3$ ).  $^{13}\text{C}\{^1\text{H}\}$  NMR (100.61 MHz, acetone- $d_6$ ):  $\delta$  148.5 (s, CN), 137.1 (s, C  $\text{C}_6\text{H}_4$ ), 137.0 (s,  $\text{N}_2\text{CH}$ ), 129.6 (s, CH  $\text{C}_6\text{H}_4$ ), 127.8 (s, C  $\text{C}_6\text{H}_4$ ), 126.0 (s, CH imi), 124.9 (s, CH  $\text{C}_6\text{H}_4$ ), 122.4 (CH imi), 37.2 (s,  $\text{NCH}_3$ ).

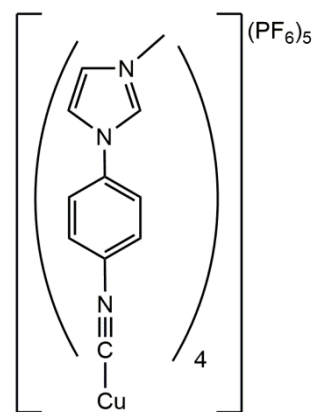

**Synthesis of compound 11.** To a solution of compound **7** (20 mg, 0.036 mmol) in acetone (5 mL)  $\text{NHMe}_2$  (2 M in THF, 18  $\mu\text{L}$ , 0.036 mmol) was added and the mixture stirred for 30 min. The solvent was eliminated to dryness under vacuum and the resulting residue washed with hexane (2 x 10 mL) to obtain an orange solid. Yield: 18 mg (82%).  $^1\text{H}$  NMR (400 MHz, acetone- $d_6$ ):  $\delta$  9.56 (s, 1H,  $\text{N}_2\text{CH}$ ), 9.26 (br, 1H, NH), 8.21 (s, 1H, CH imi), 7.95 (s, 1H, CH imi), 7.85 (d,  $^3J(\text{H,H}) = 8.8$  Hz, 2H,  $\text{C}_6\text{H}_4$ ), 7.80 (d,  $^3J(\text{H,H}) = 8.9$  Hz, 2H,  $\text{C}_6\text{H}_4$ ), 4.20 (s, 3H,  $\text{NCH}_3$ ), 3.72 (s, 3H,  $\text{N}(\text{CH}_3)_2$ ), 3.30 (s, 3H,  $\text{N}(\text{CH}_3)_2$ ).  $^{13}\text{C}\{^1\text{H}\}$  NMR (100.61 MHz, acetone- $d_6$ ):  $\delta$  192.2 (s,  $\text{C}_{\text{carbene}}$ ), 143.9 (s, C  $\text{C}_6\text{H}_4$ ), 136.9 (s,  $\text{N}_2\text{CH}$ ), 133.6 (s, C  $\text{C}_6\text{H}_4$ ), 126.9 (s, CH  $\text{C}_6\text{H}_4$ ), 125.6 (s, CH imi), 123.7 (s, CH  $\text{C}_6\text{H}_4$ ), 122.7 (CH imi), 48.9 (s,  $\text{N}(\text{CH}_3)_2$ ), 37.6 (s,  $\text{N}(\text{CH}_3)_2$ ), 37.1 (s,  $\text{NCH}_3$ ). MS (ESI):  $m/z$ :  $[M - \text{PF}_6]^+$ : calcd for  $\text{C}_{13}\text{H}_{17}\text{AuClN}_4$ : 461.0807, found: 461.0808.

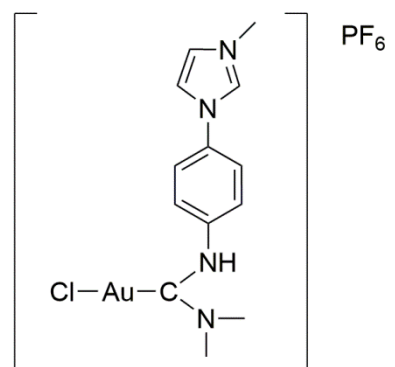

**Synthesis of compound 12.** To a solution containing compound **9** (20 mg, 0.026 mmol) and  $[\text{AuCl}(\text{SMe}_2)]$  (8 mg, 0.026 mmol) in acetonitrile (6 mL) at  $-20^\circ\text{C}$   $\text{LiN}(\text{SiMe}_3)_2$  (1 M in hexane, 0.029 mL, 0.029 mmol) was added and the resulting mixture stirred for 30 min. The solution was then stirred at room temperature for 1 h. The solvent was removed under reduced pressure and the resulting residue extracted with  $\text{CH}_2\text{Cl}_2$  and filtered. Yellow crystals of **11** suitable for X-ray diffraction were obtained by slow diffusion of hexane into a dichloromethane solution of the compound. Yield: 15 mg (68%). IR ( $\text{CH}_2\text{Cl}_2$ ,  $\text{cm}^{-1}$ ):  $\nu(\text{CN})$  2173 (m);  $\nu(\text{CO})$  2051 (vs), 1993 (s), 1961 (s).  $^1\text{H}$  NMR (400 MHz,  $\text{CD}_2\text{Cl}_2$ ):  $\delta$  9.05 (d,  $^3J(\text{H,H}) = 5.2$  Hz, 2H, bipy), 8.40 (d,  $^3J(\text{H,H}) = 8.1$  Hz, 2H, bipy), 8.24 (t,  $^3J(\text{H,H}) = 7.2$  Hz, 2H, bipy), 7.75–7.71 (m, 4H, bipy,  $\text{C}_6\text{H}_4$ ), 7.41 (d,  $^3J(\text{H,H}) = 8.3$  Hz, 2H,  $\text{C}_6\text{H}_4$ ), 7.27 (s, 1H, CH imi), 7.17 (s, 1H, CH imi), 3.89 (s, 3H,  $\text{NCH}_3$ ). MS (ESI):  $m/z$ :  $[M - \text{PF}_6]^+$ : calcd for  $\text{C}_{24}\text{H}_{17}\text{AuMnClN}_5\text{O}_3$ : 710.0066, found: 710.0056.

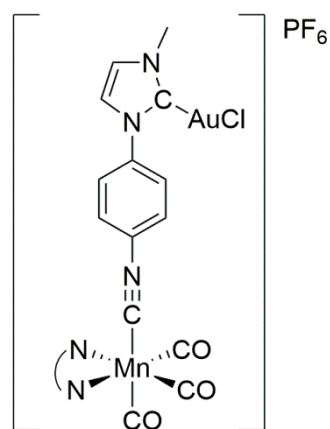

<sup>1</sup>H NMR (CD<sub>2</sub>Cl<sub>2</sub>) spectrum of **Compound 2**

H<sub>2</sub>O  
\*

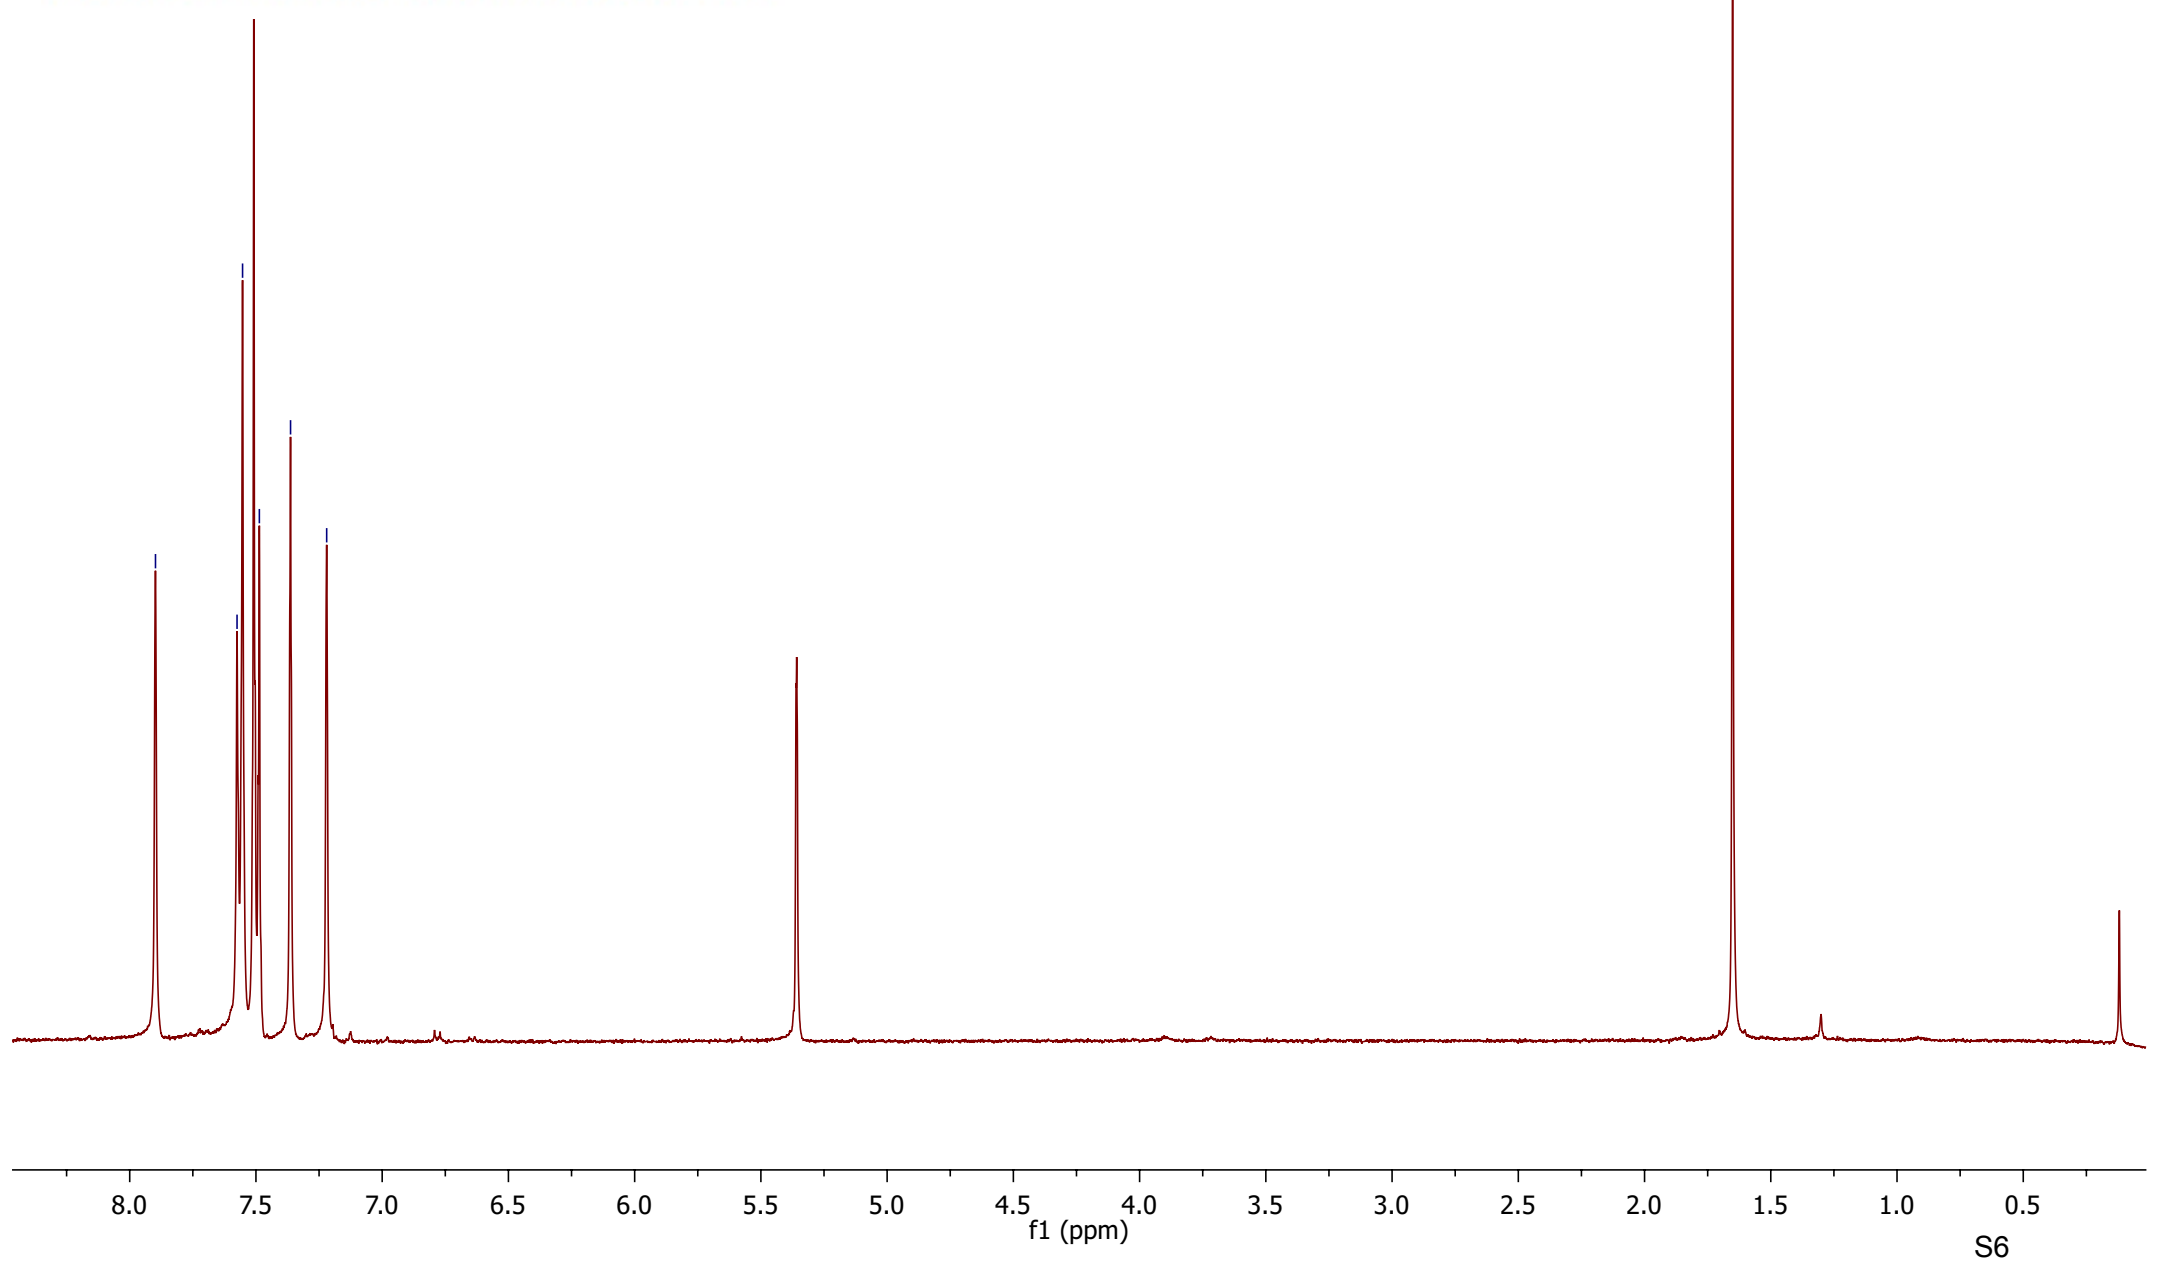

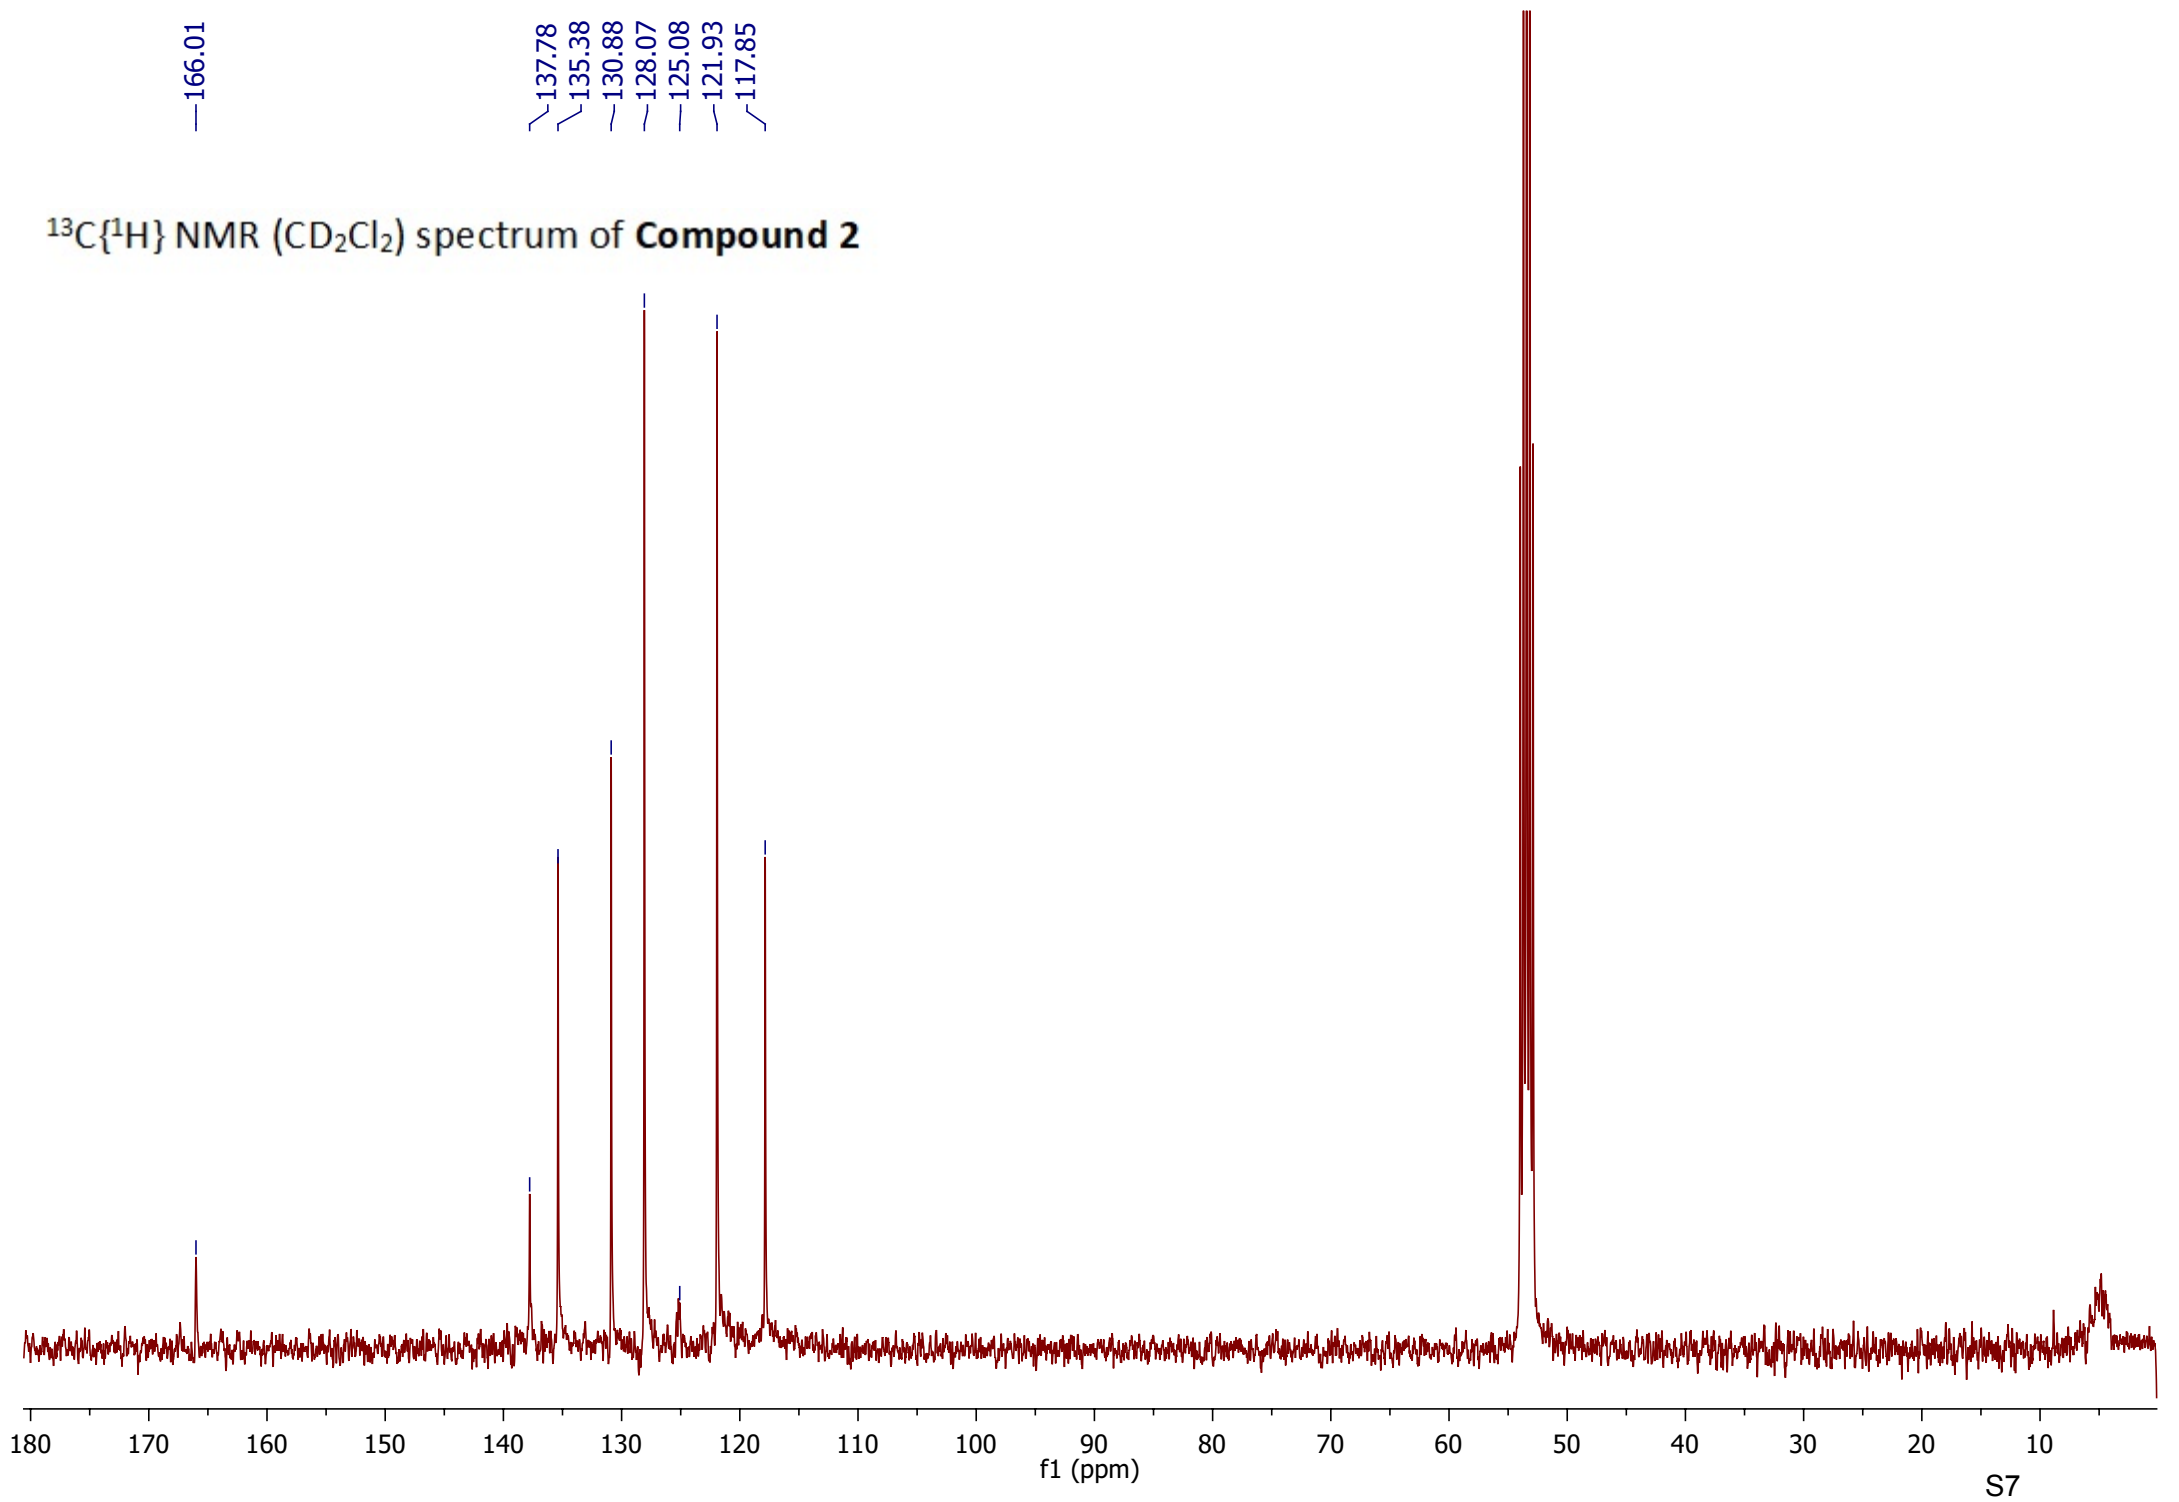

9.35

7.81  
7.80  
7.78  
7.72  
7.70  
7.60

3.98

# $^1\text{H}$ NMR ( $\text{CD}_3\text{CN}$ ) spectrum of **Compound 3**

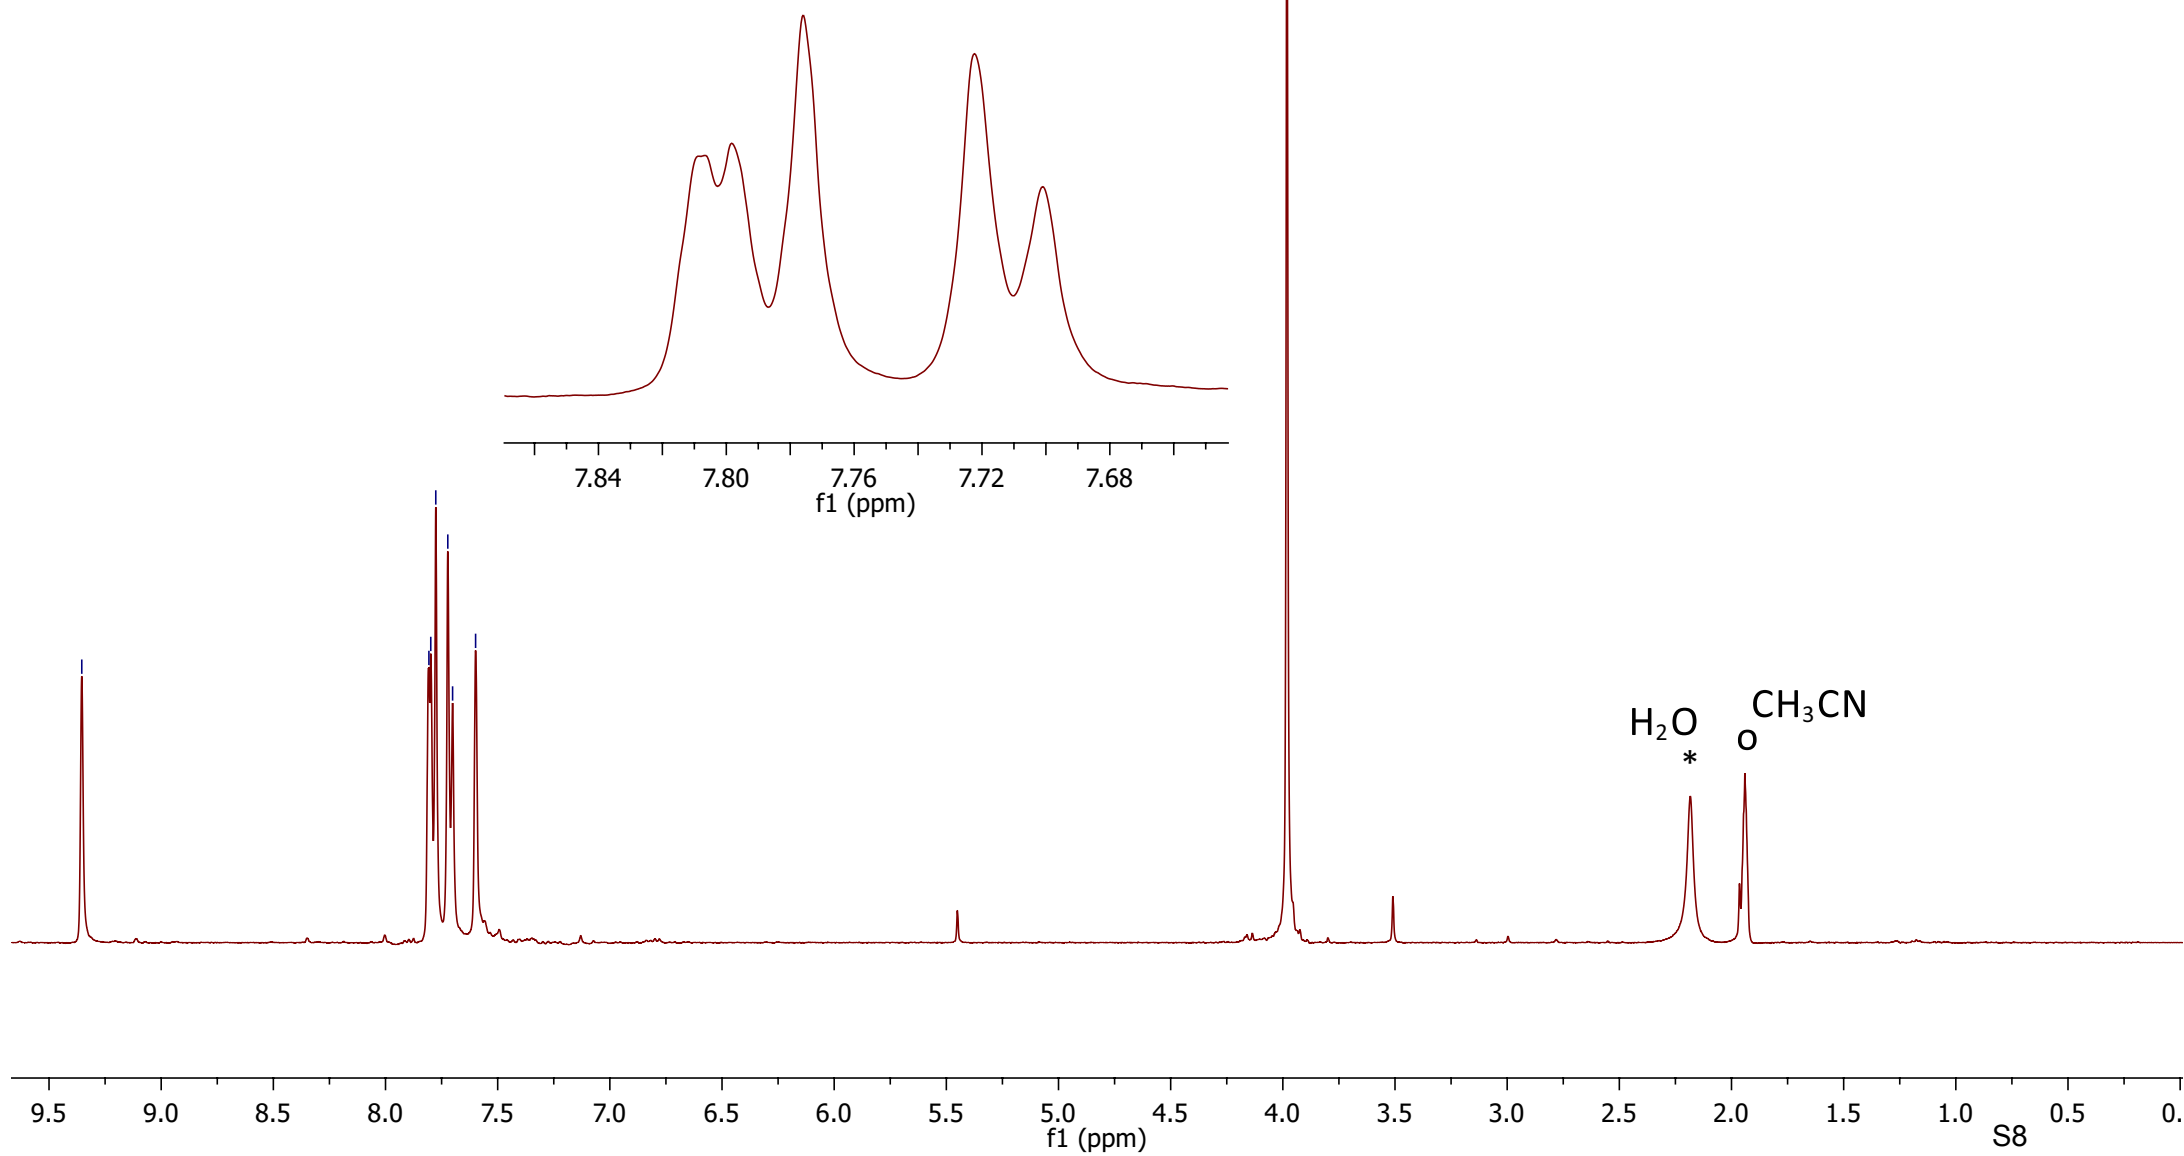



$^{13}\text{C}\{^1\text{H}\}$  NMR ( $\text{CD}_3\text{CN}$ ) spectrum of **Compound 3**

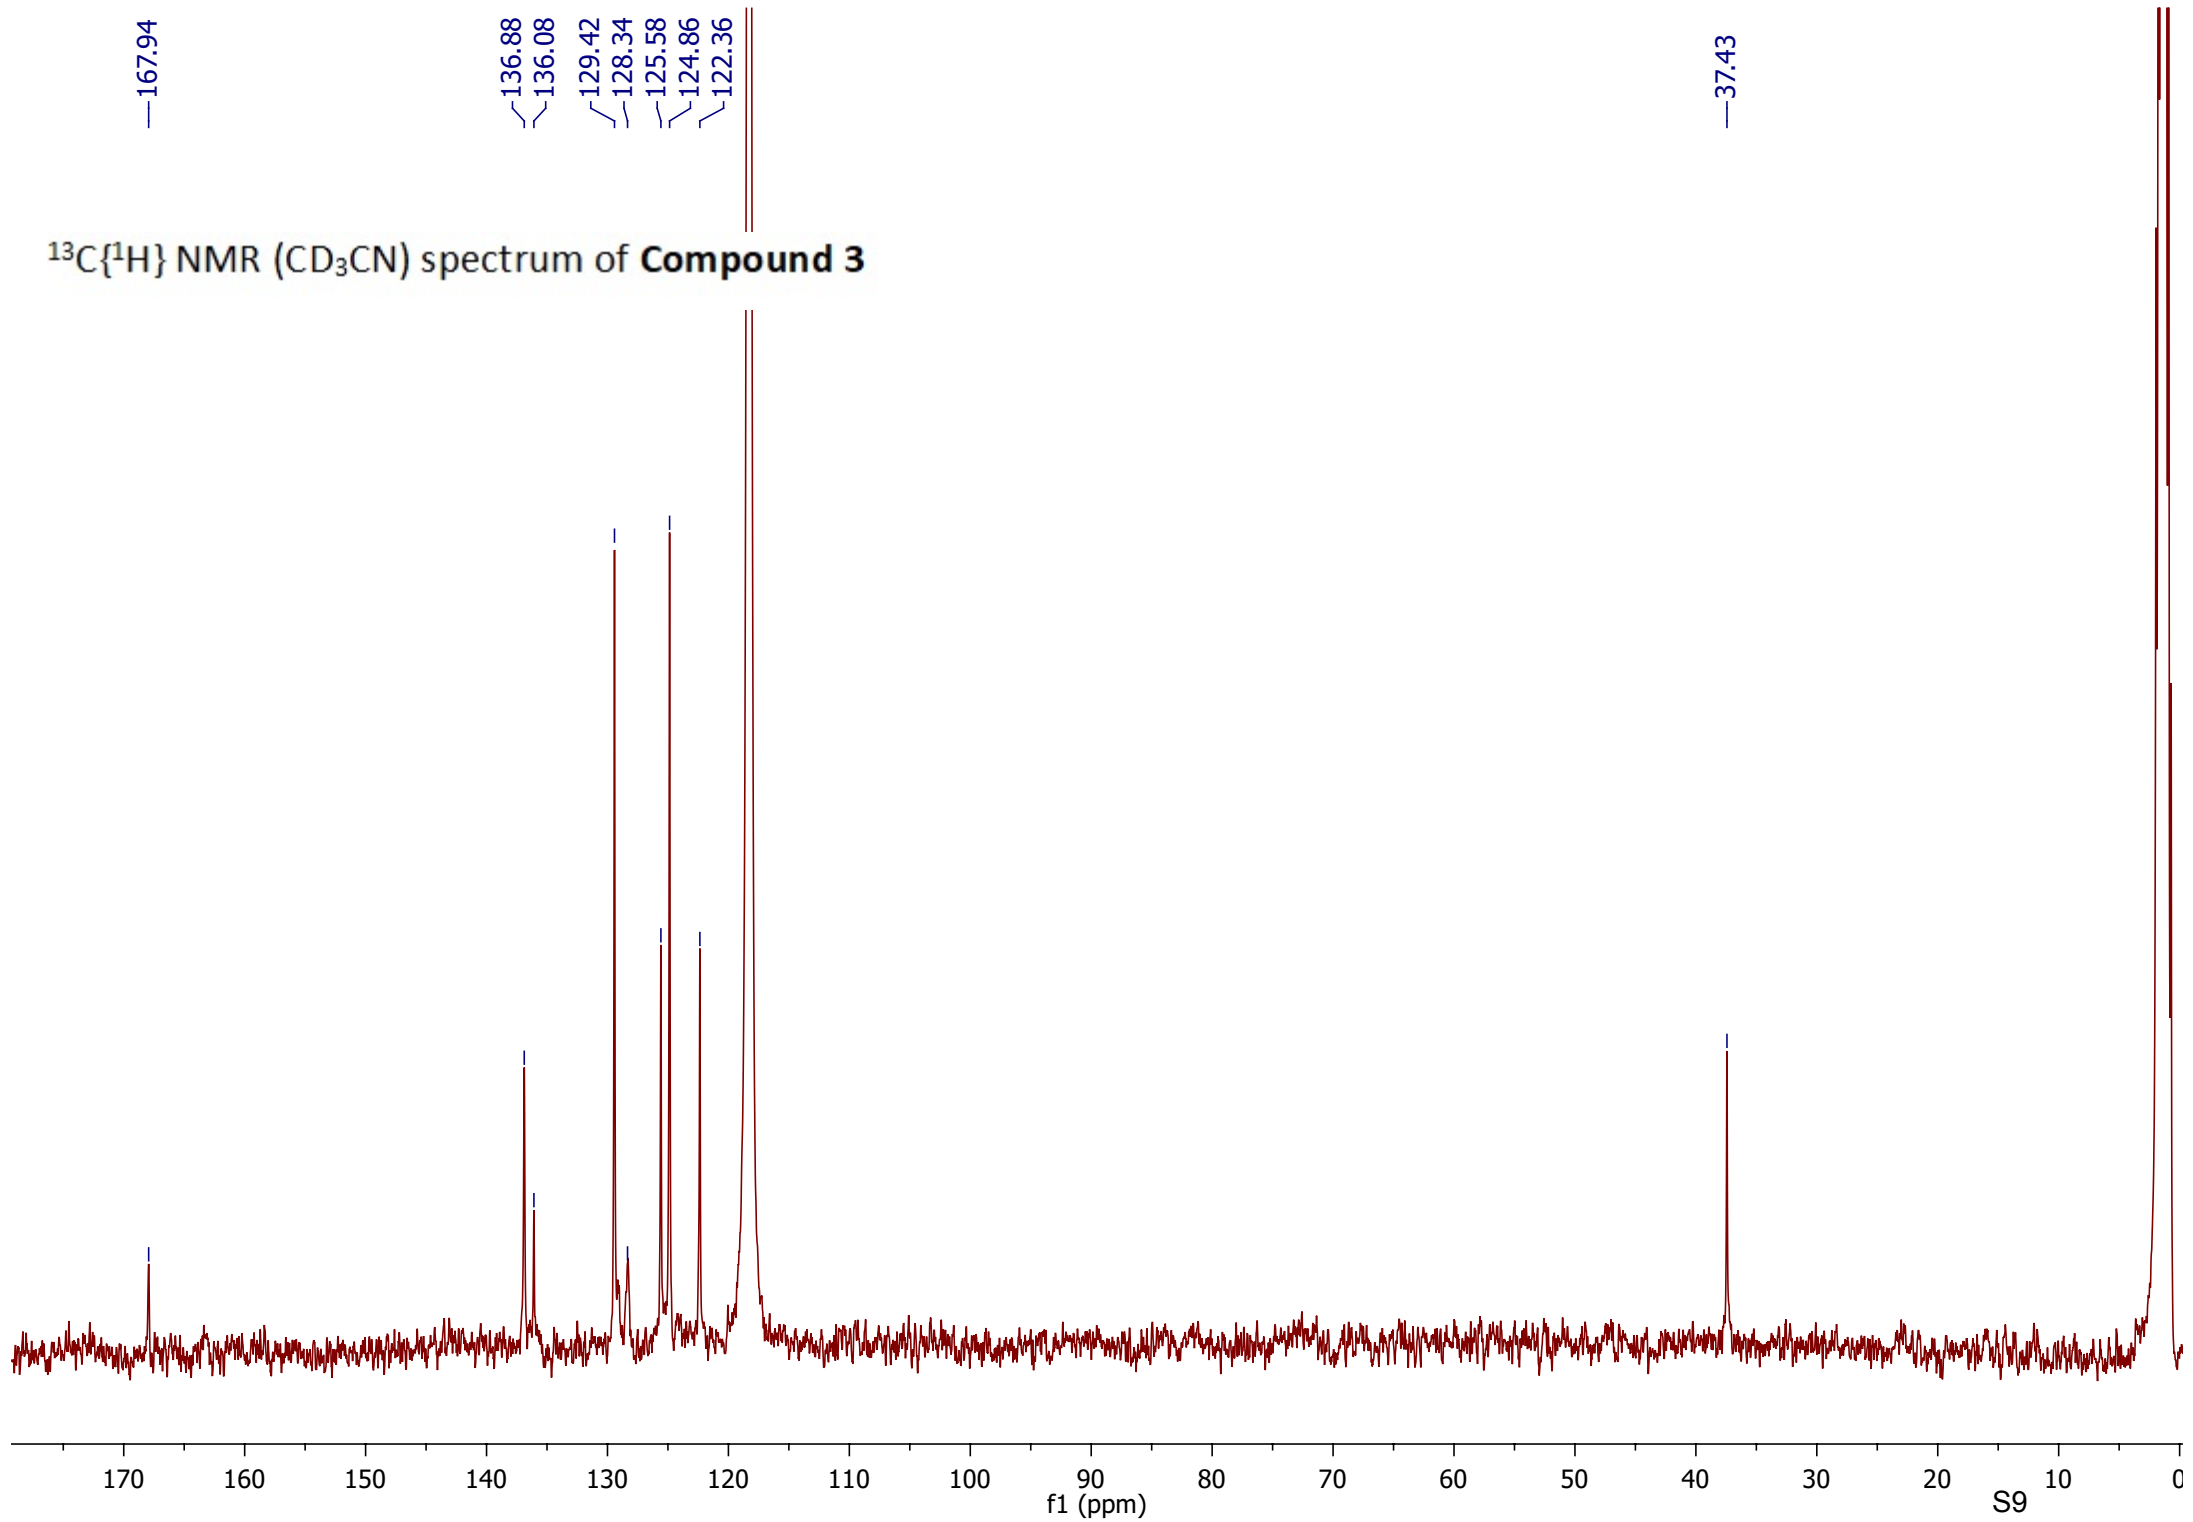

<sup>1</sup>H NMR (acetone-d<sub>6</sub>) spectrum of **Compound 4**

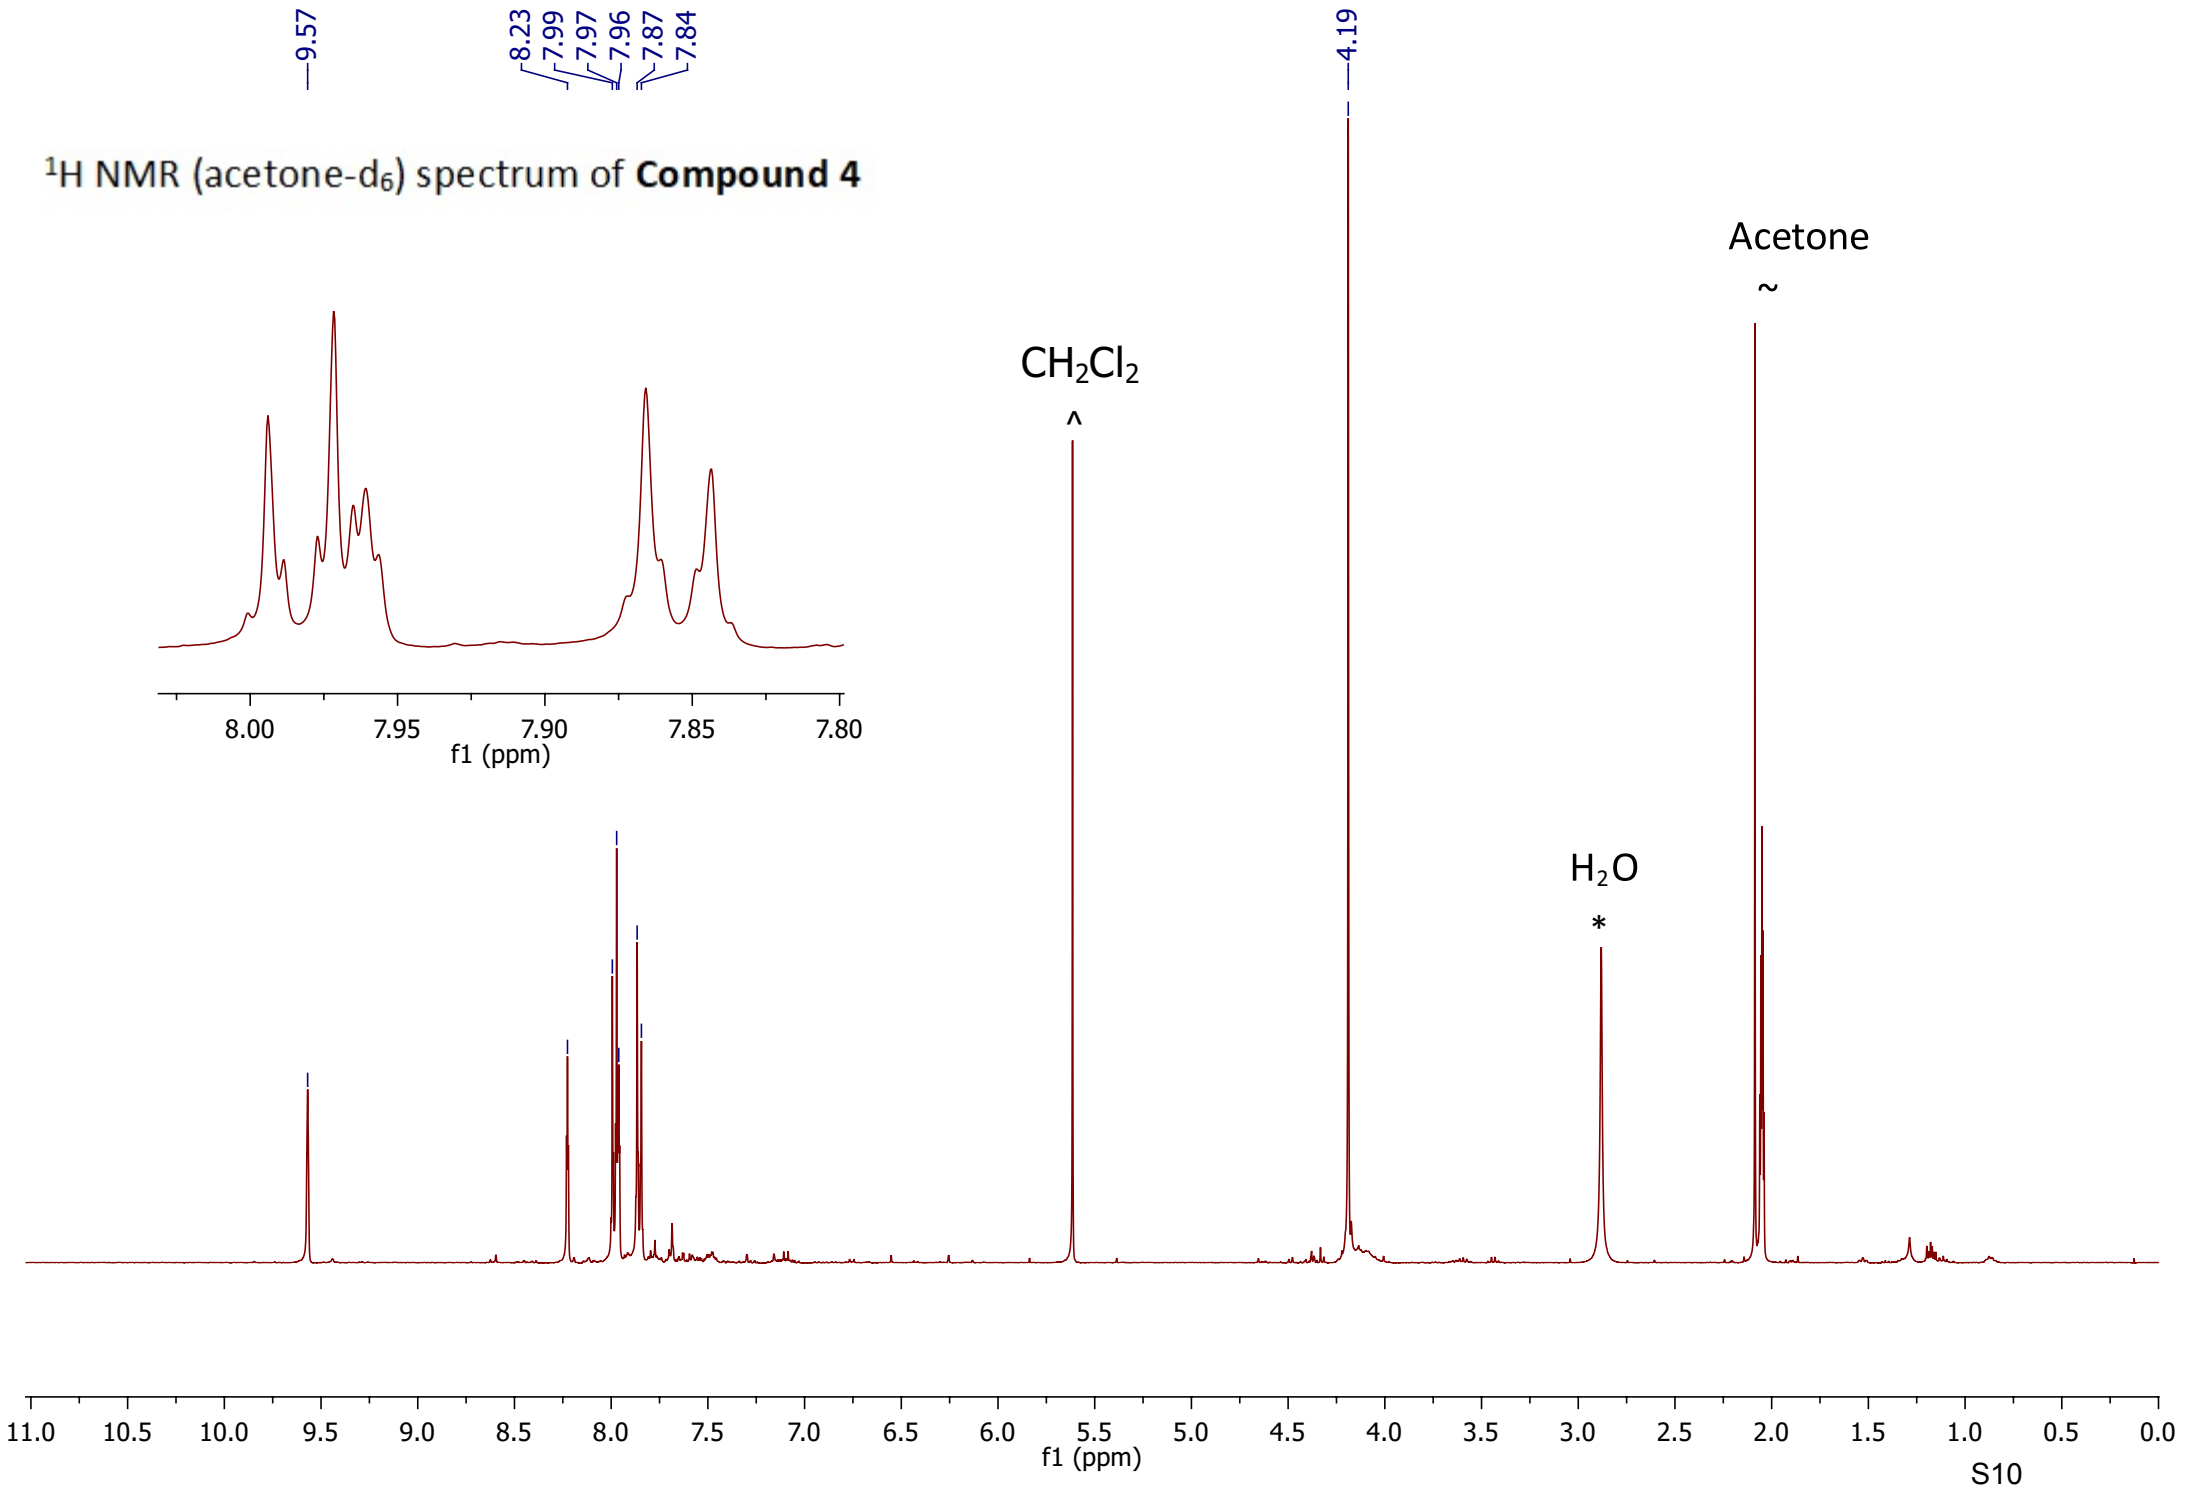

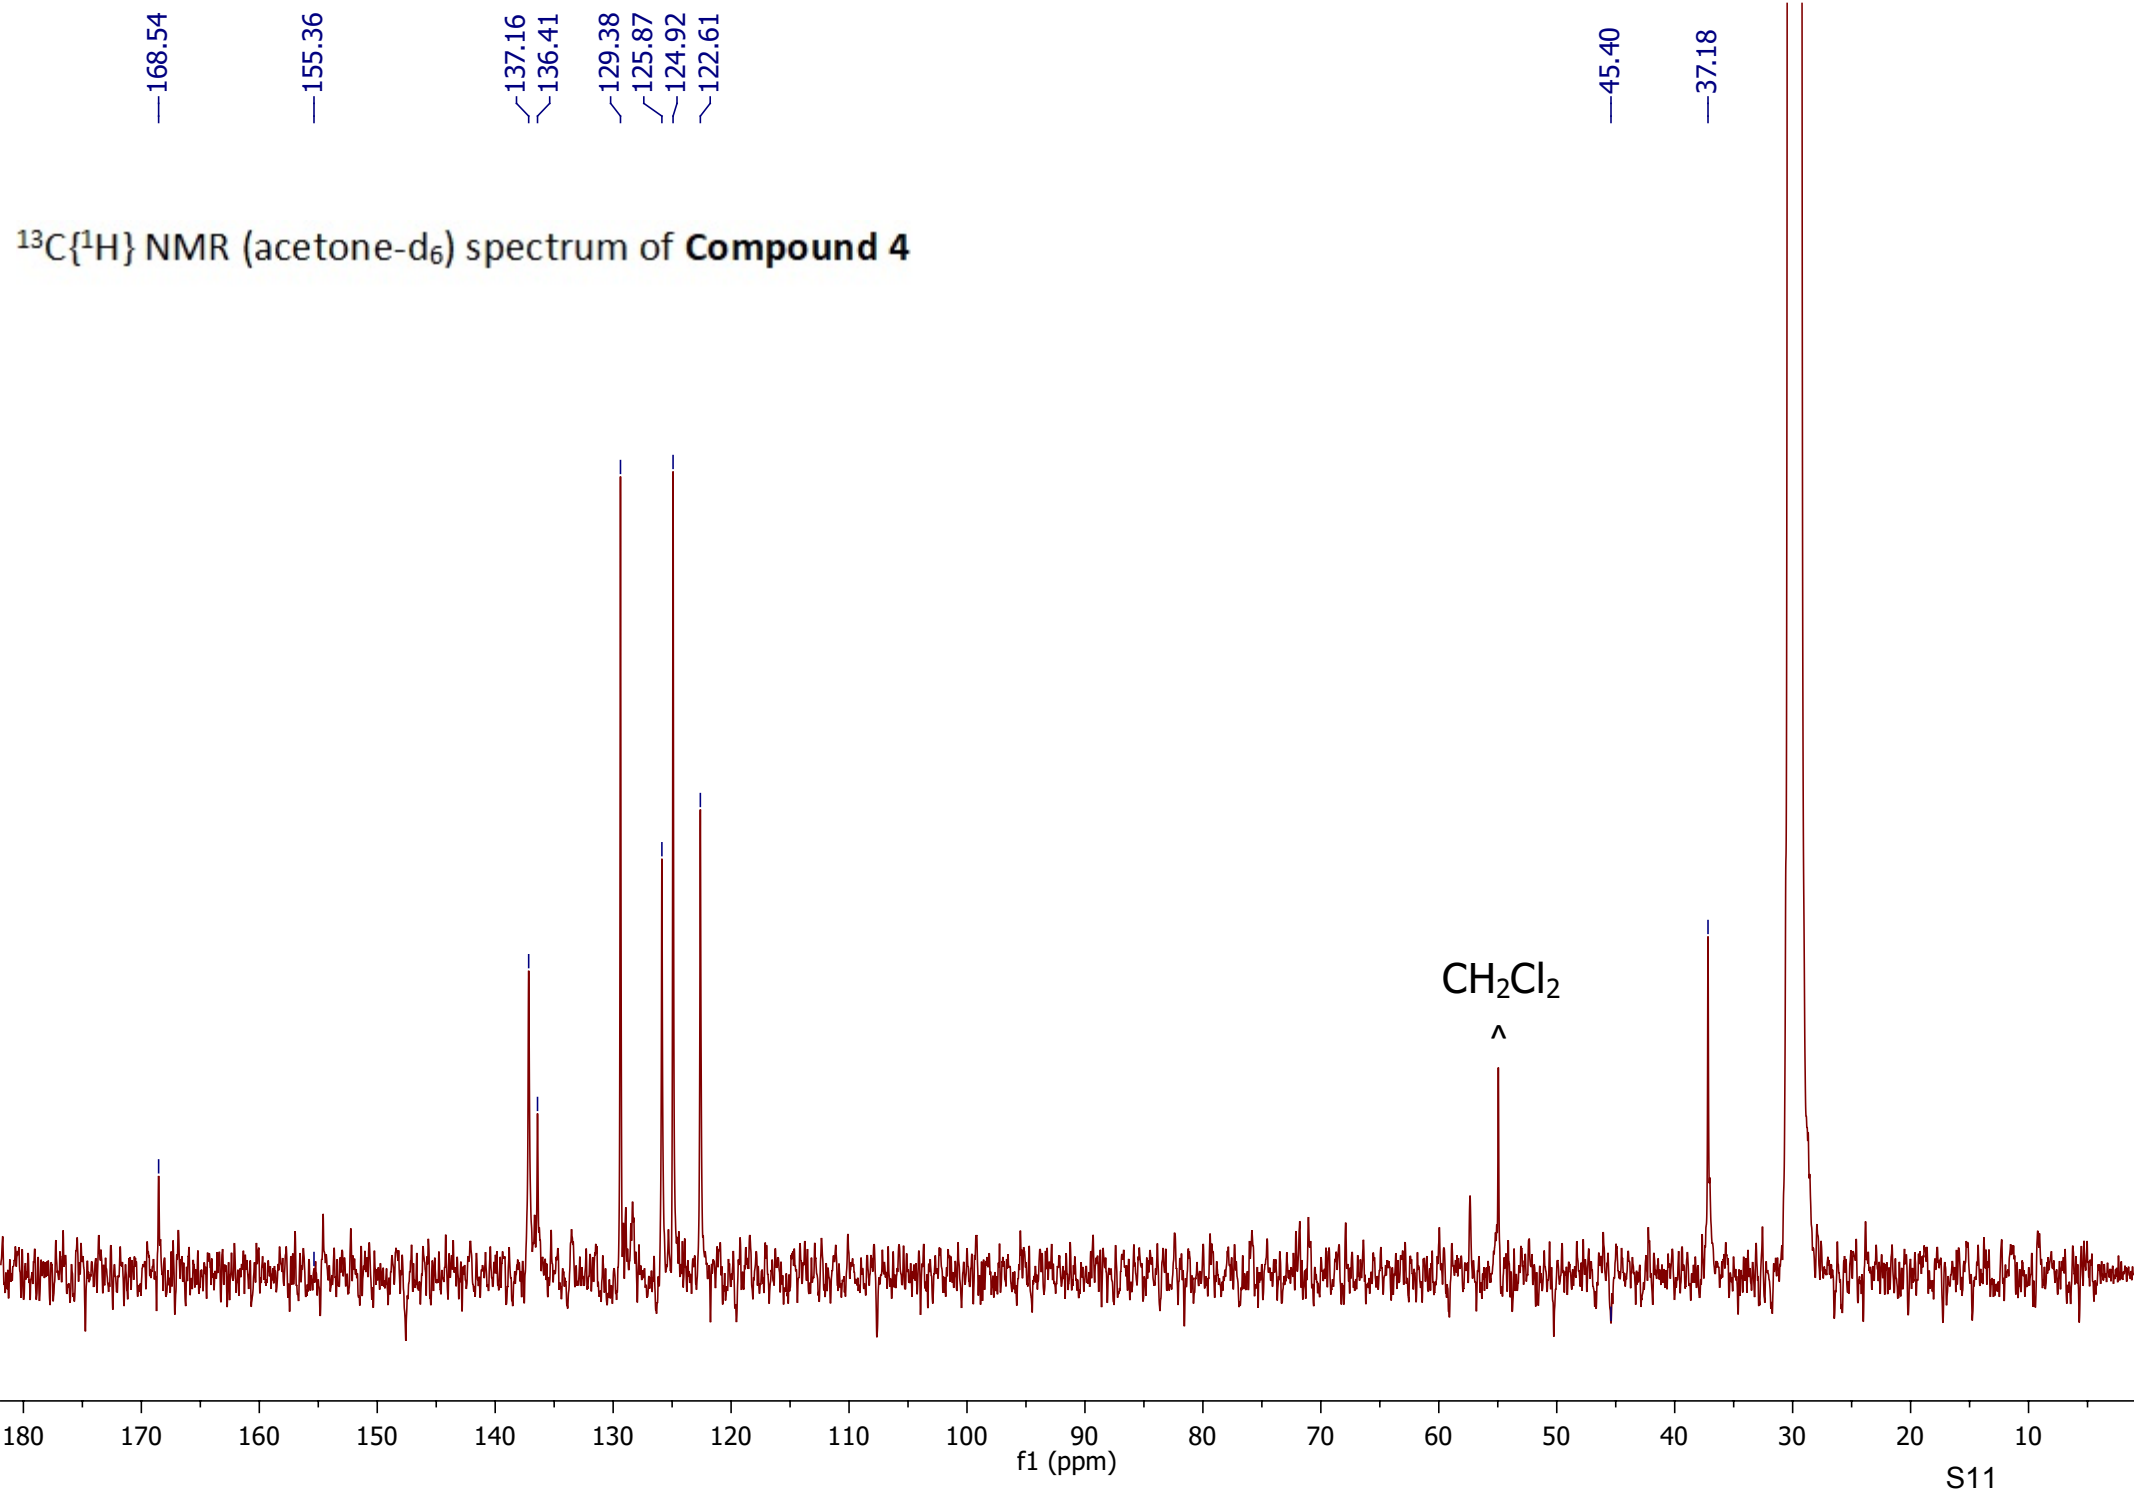

7.73  
7.70  
7.51  
7.49  
6.89  
6.88  
6.86  
6.85

$^1\text{H}$  NMR ( $\text{CD}_2\text{Cl}_2$ ) spectrum of **Compound 6**

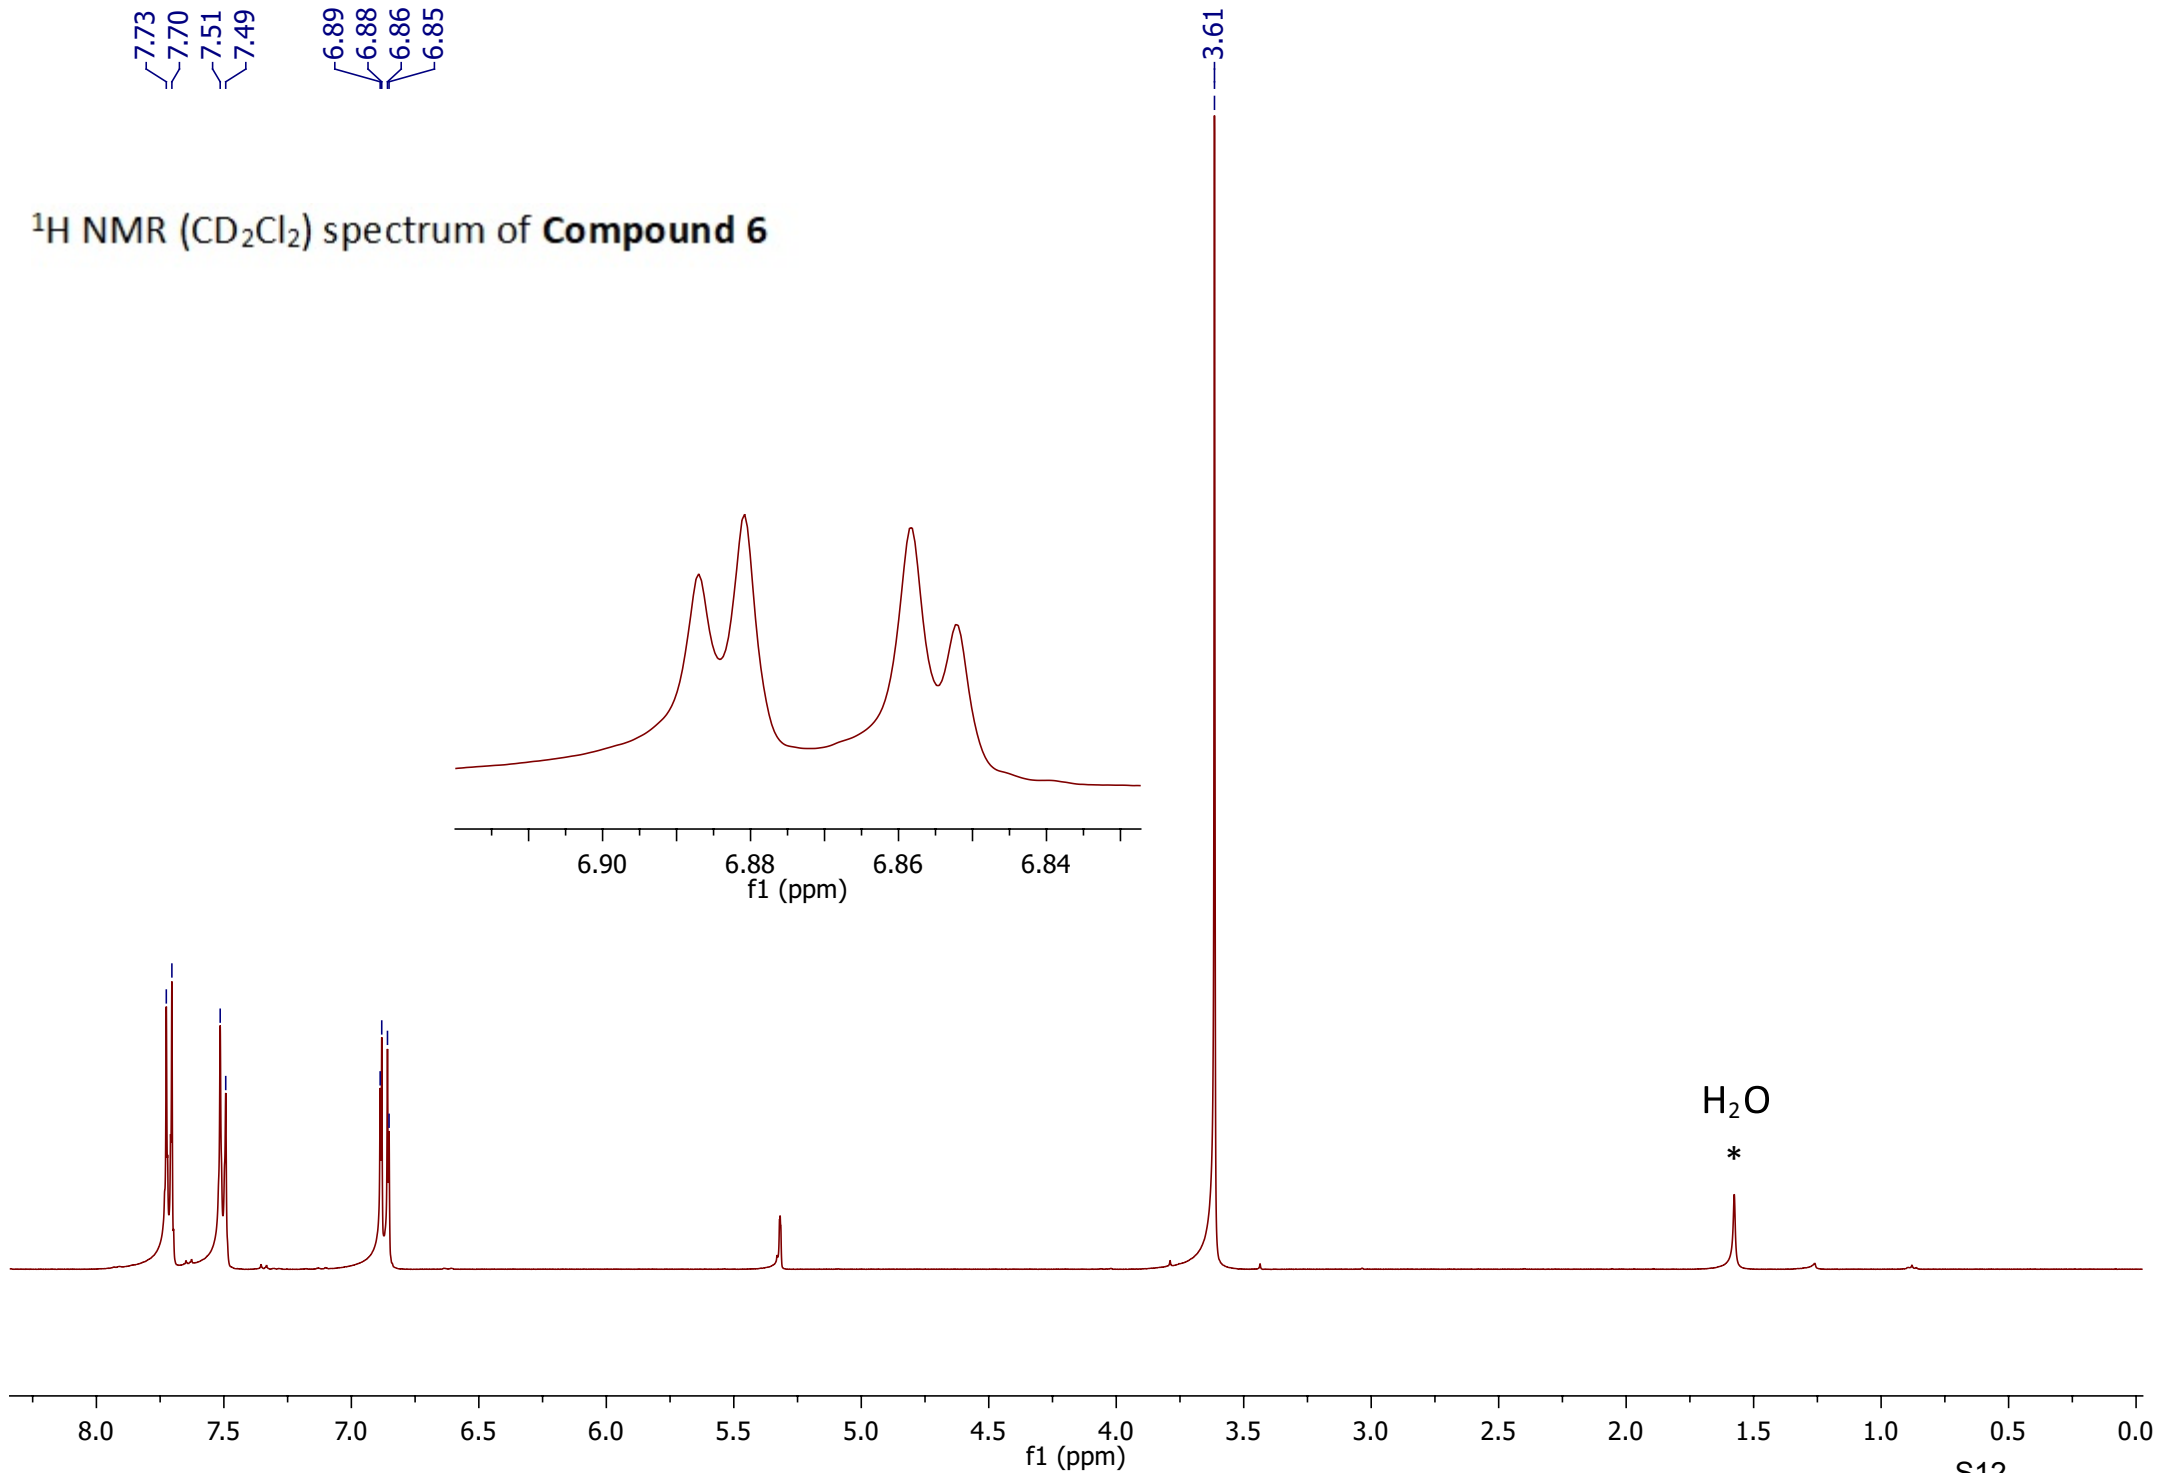

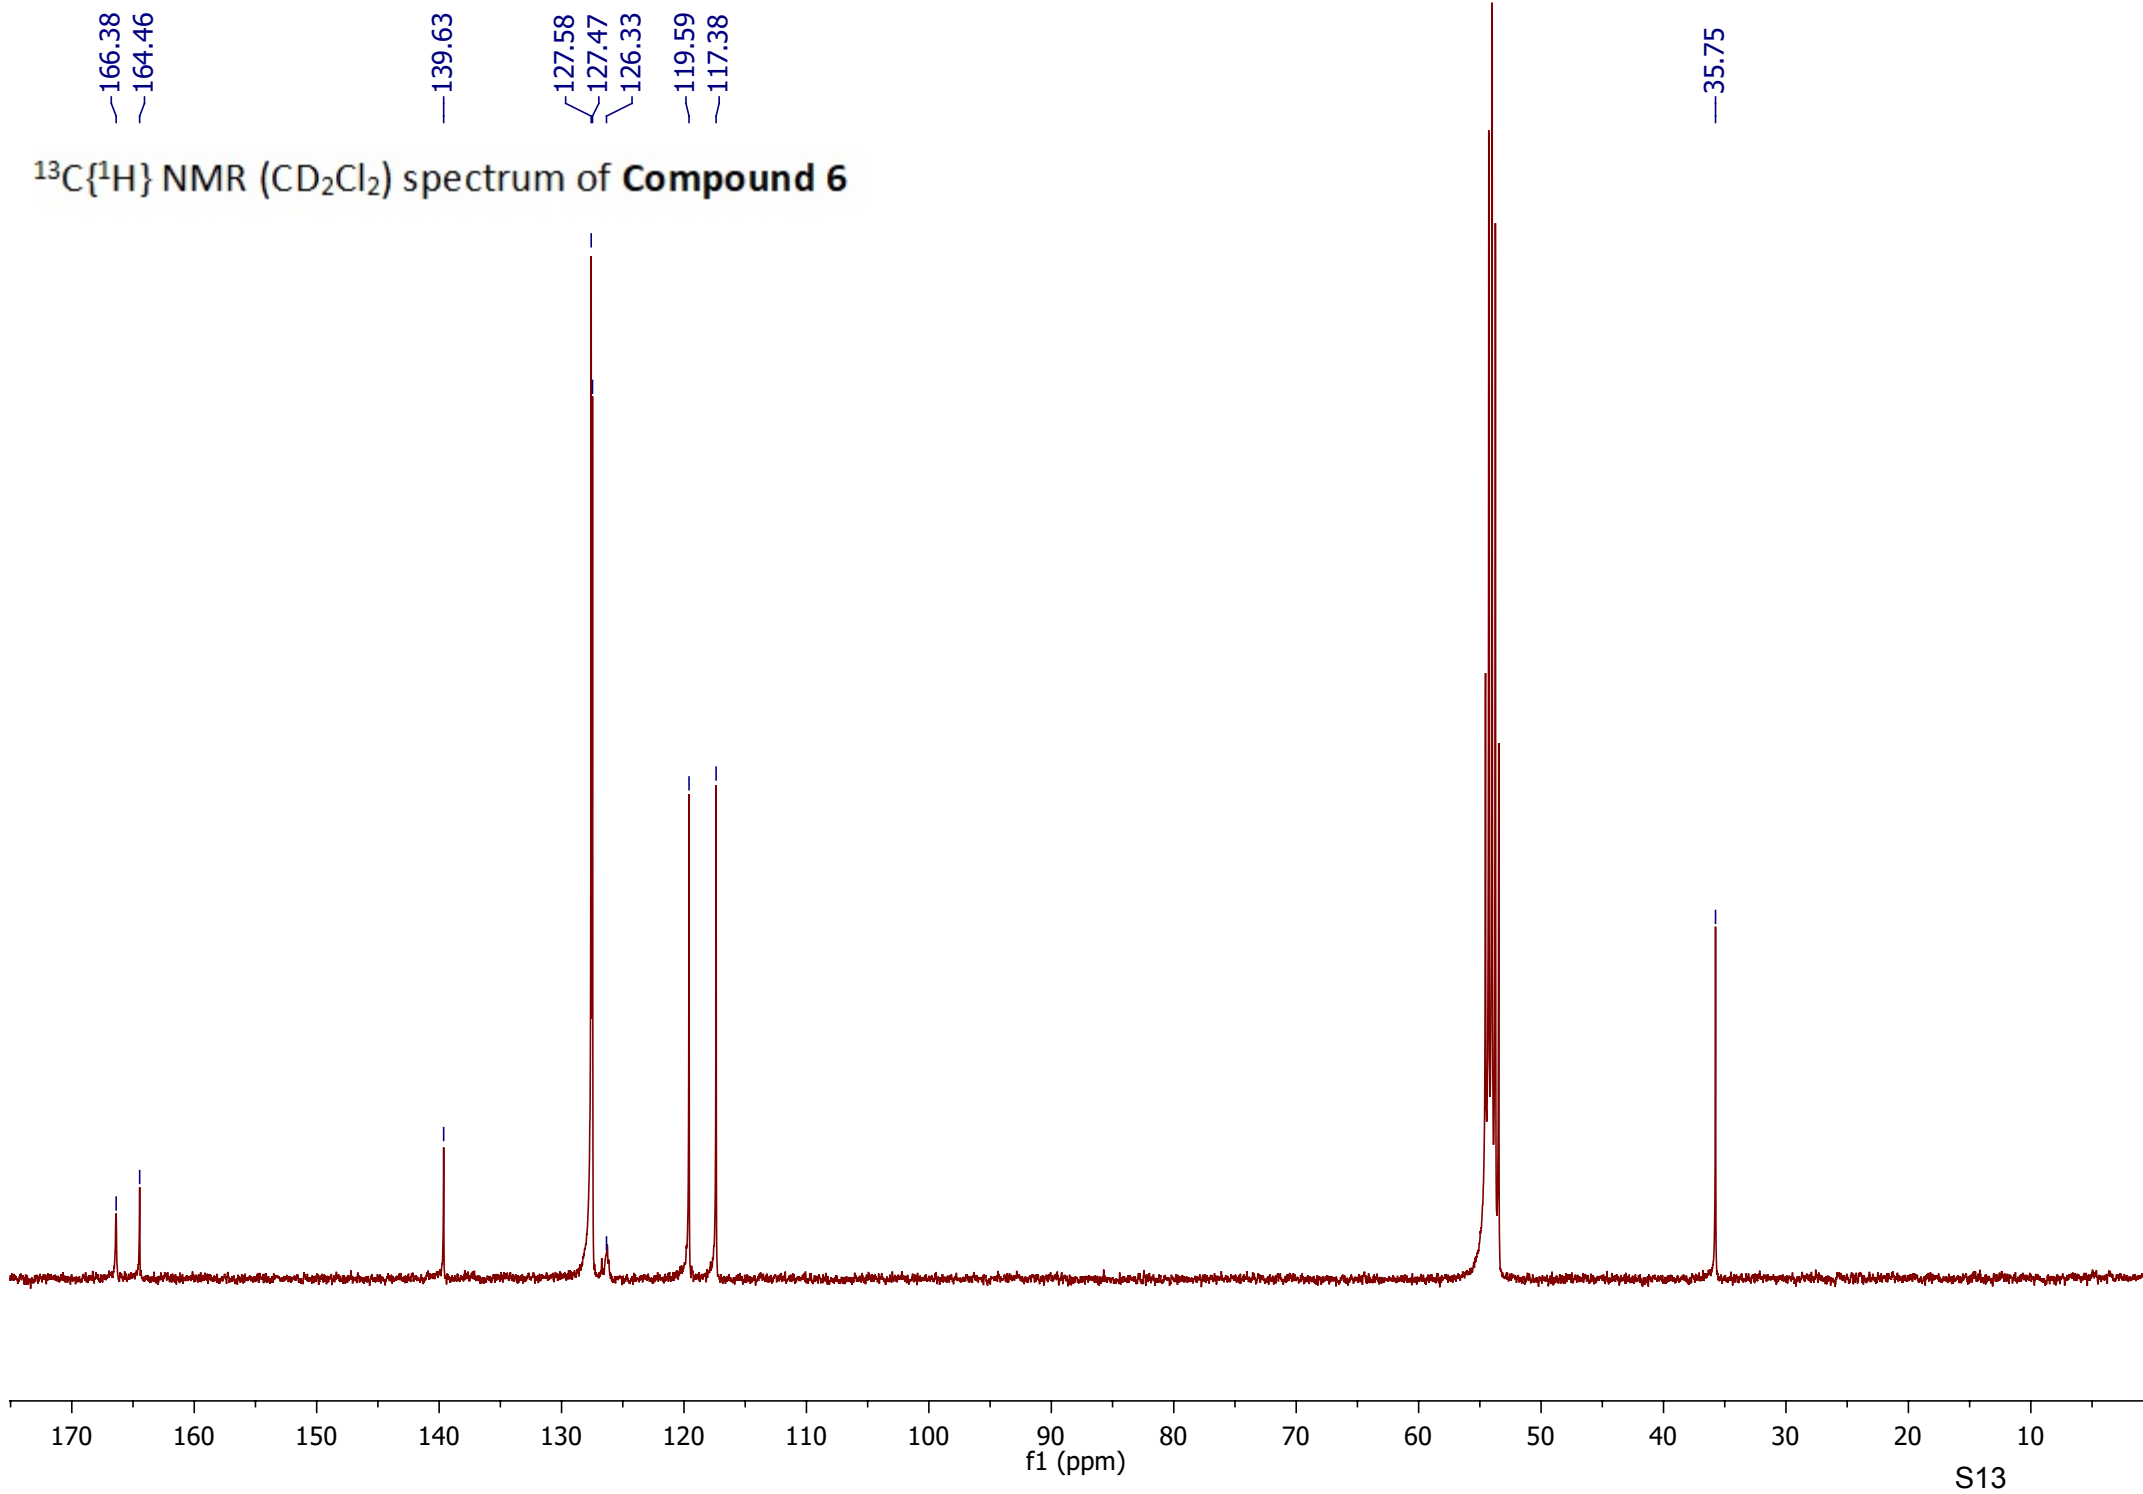



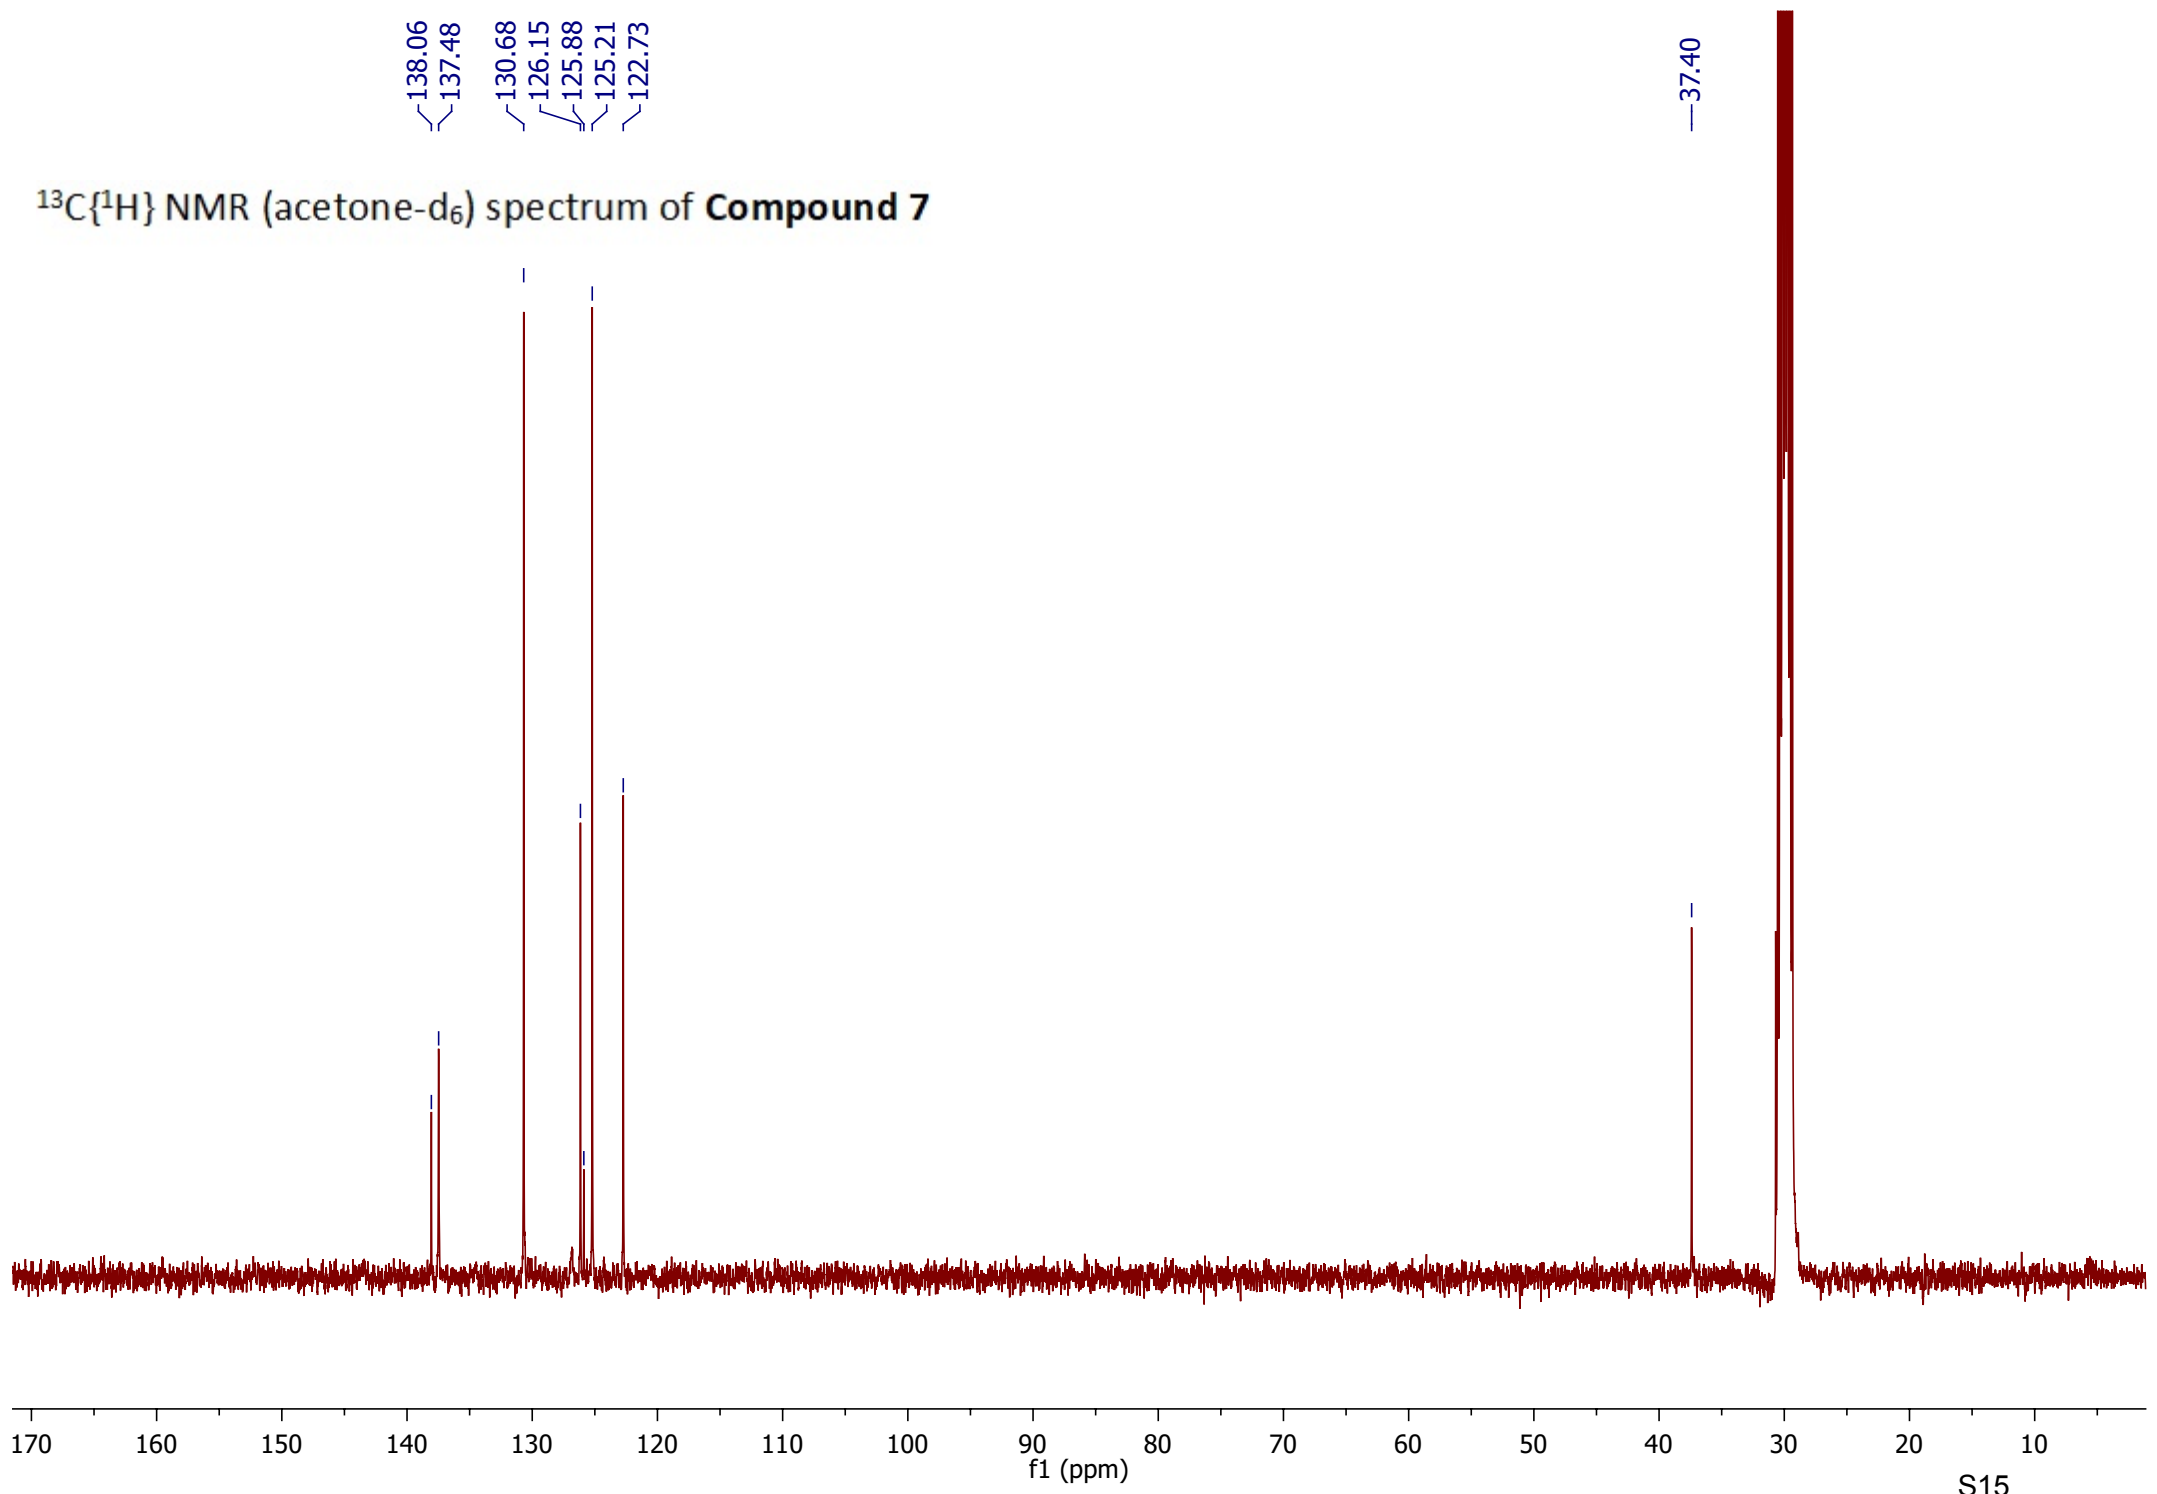





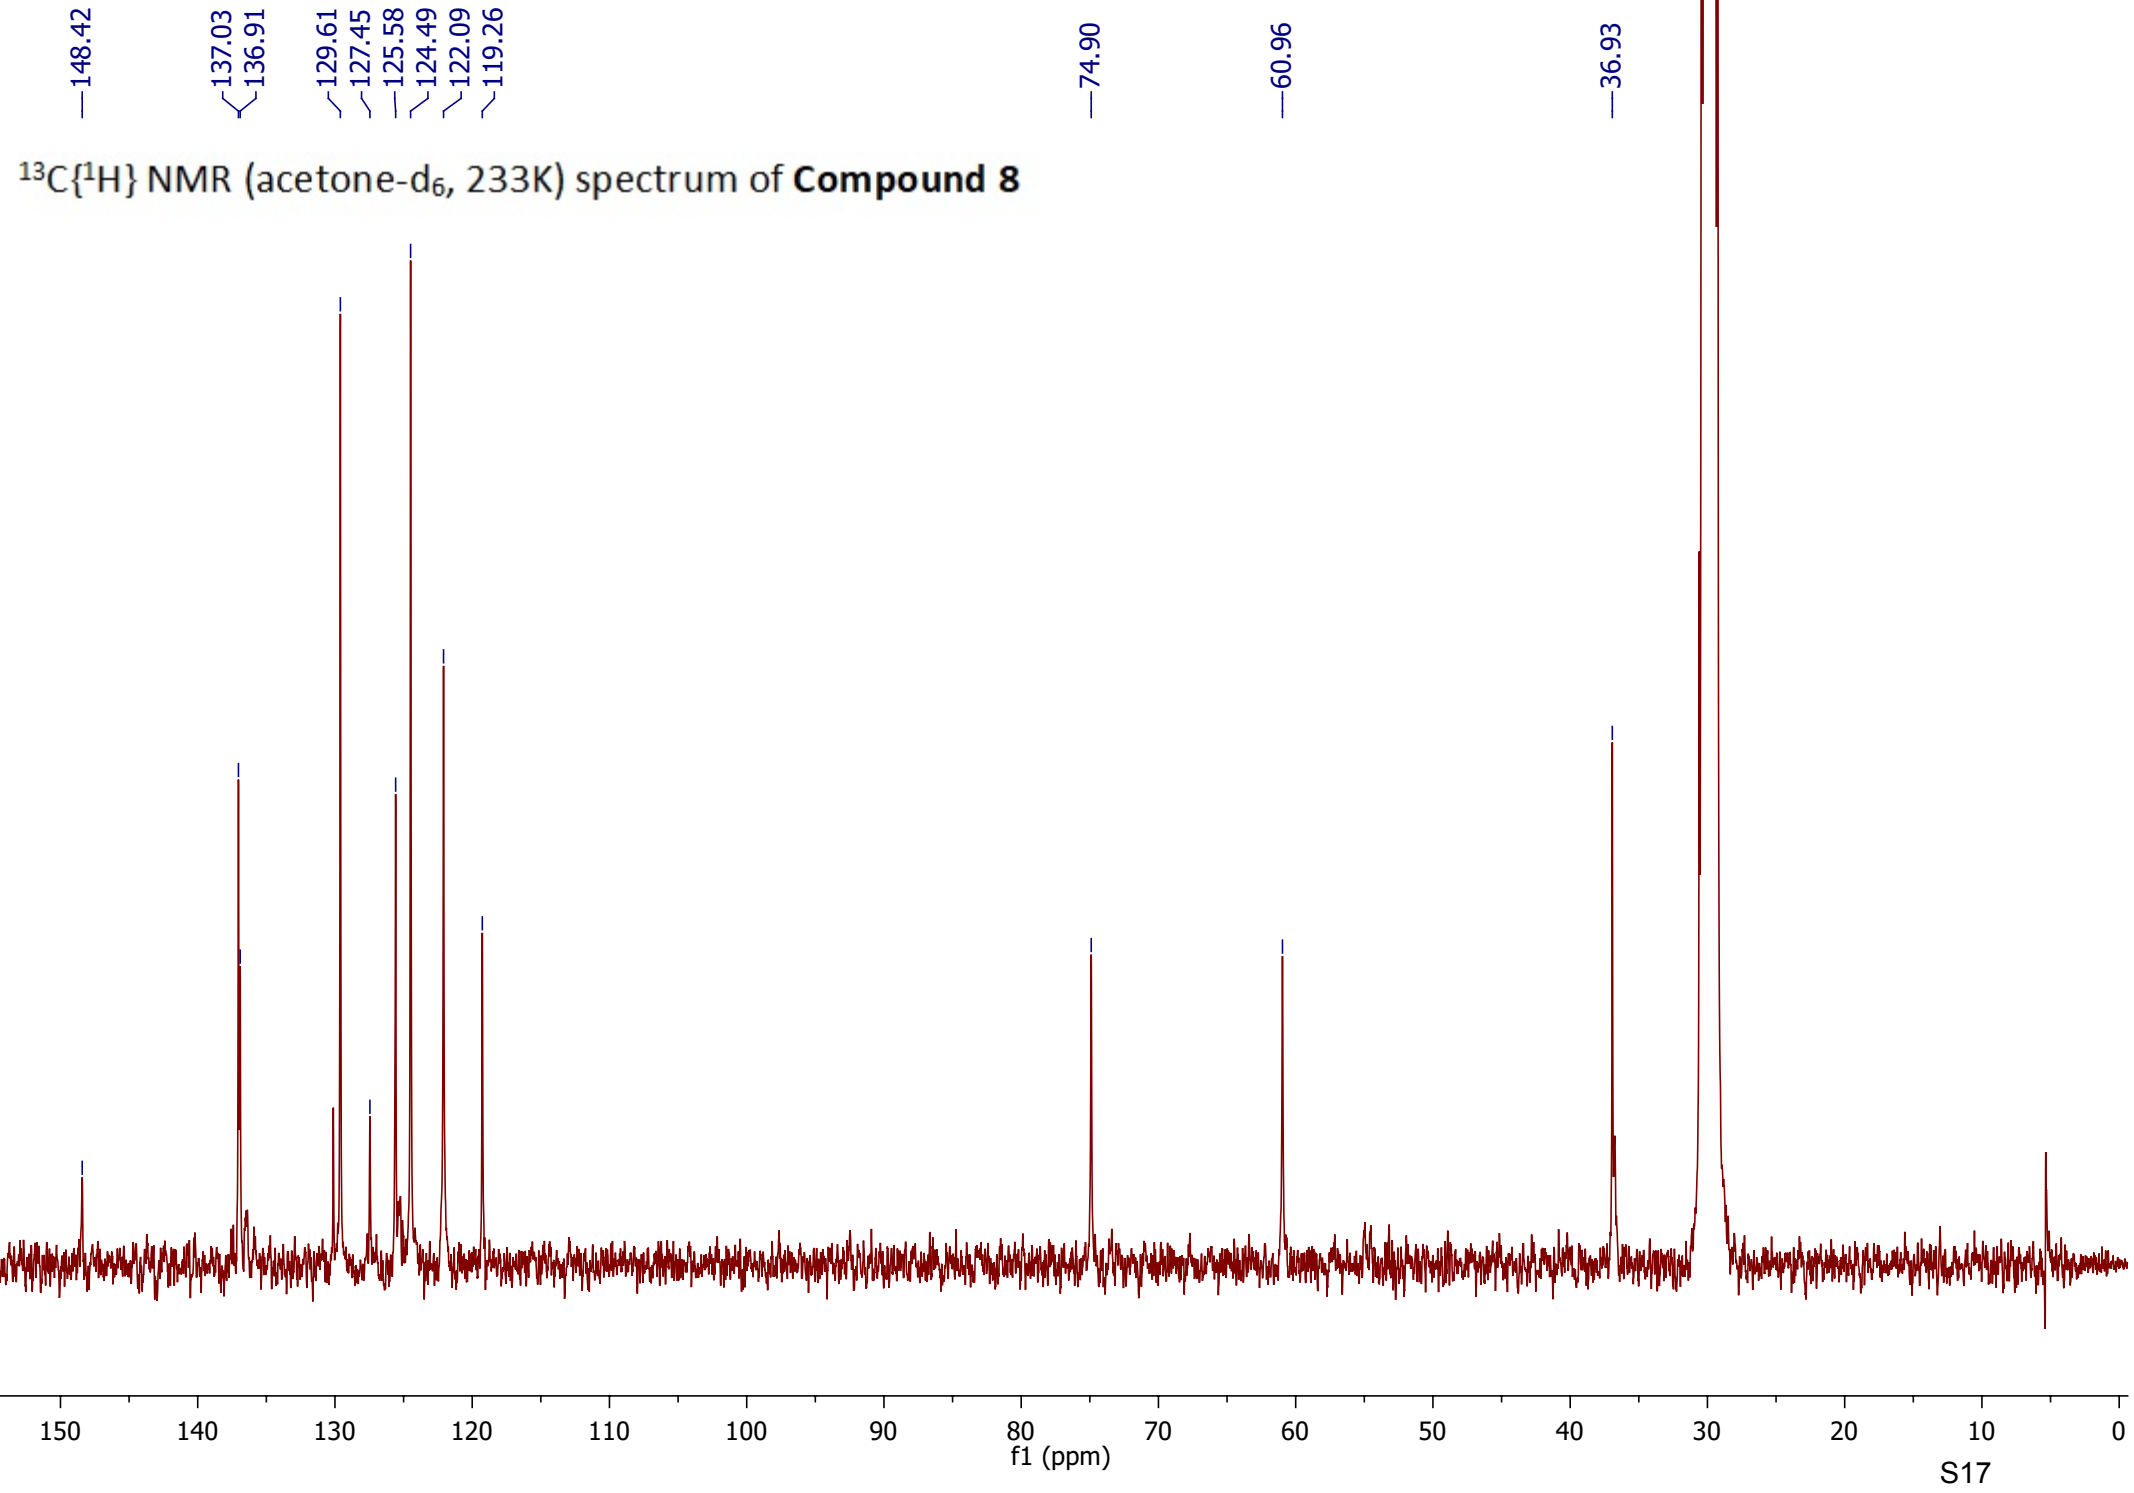

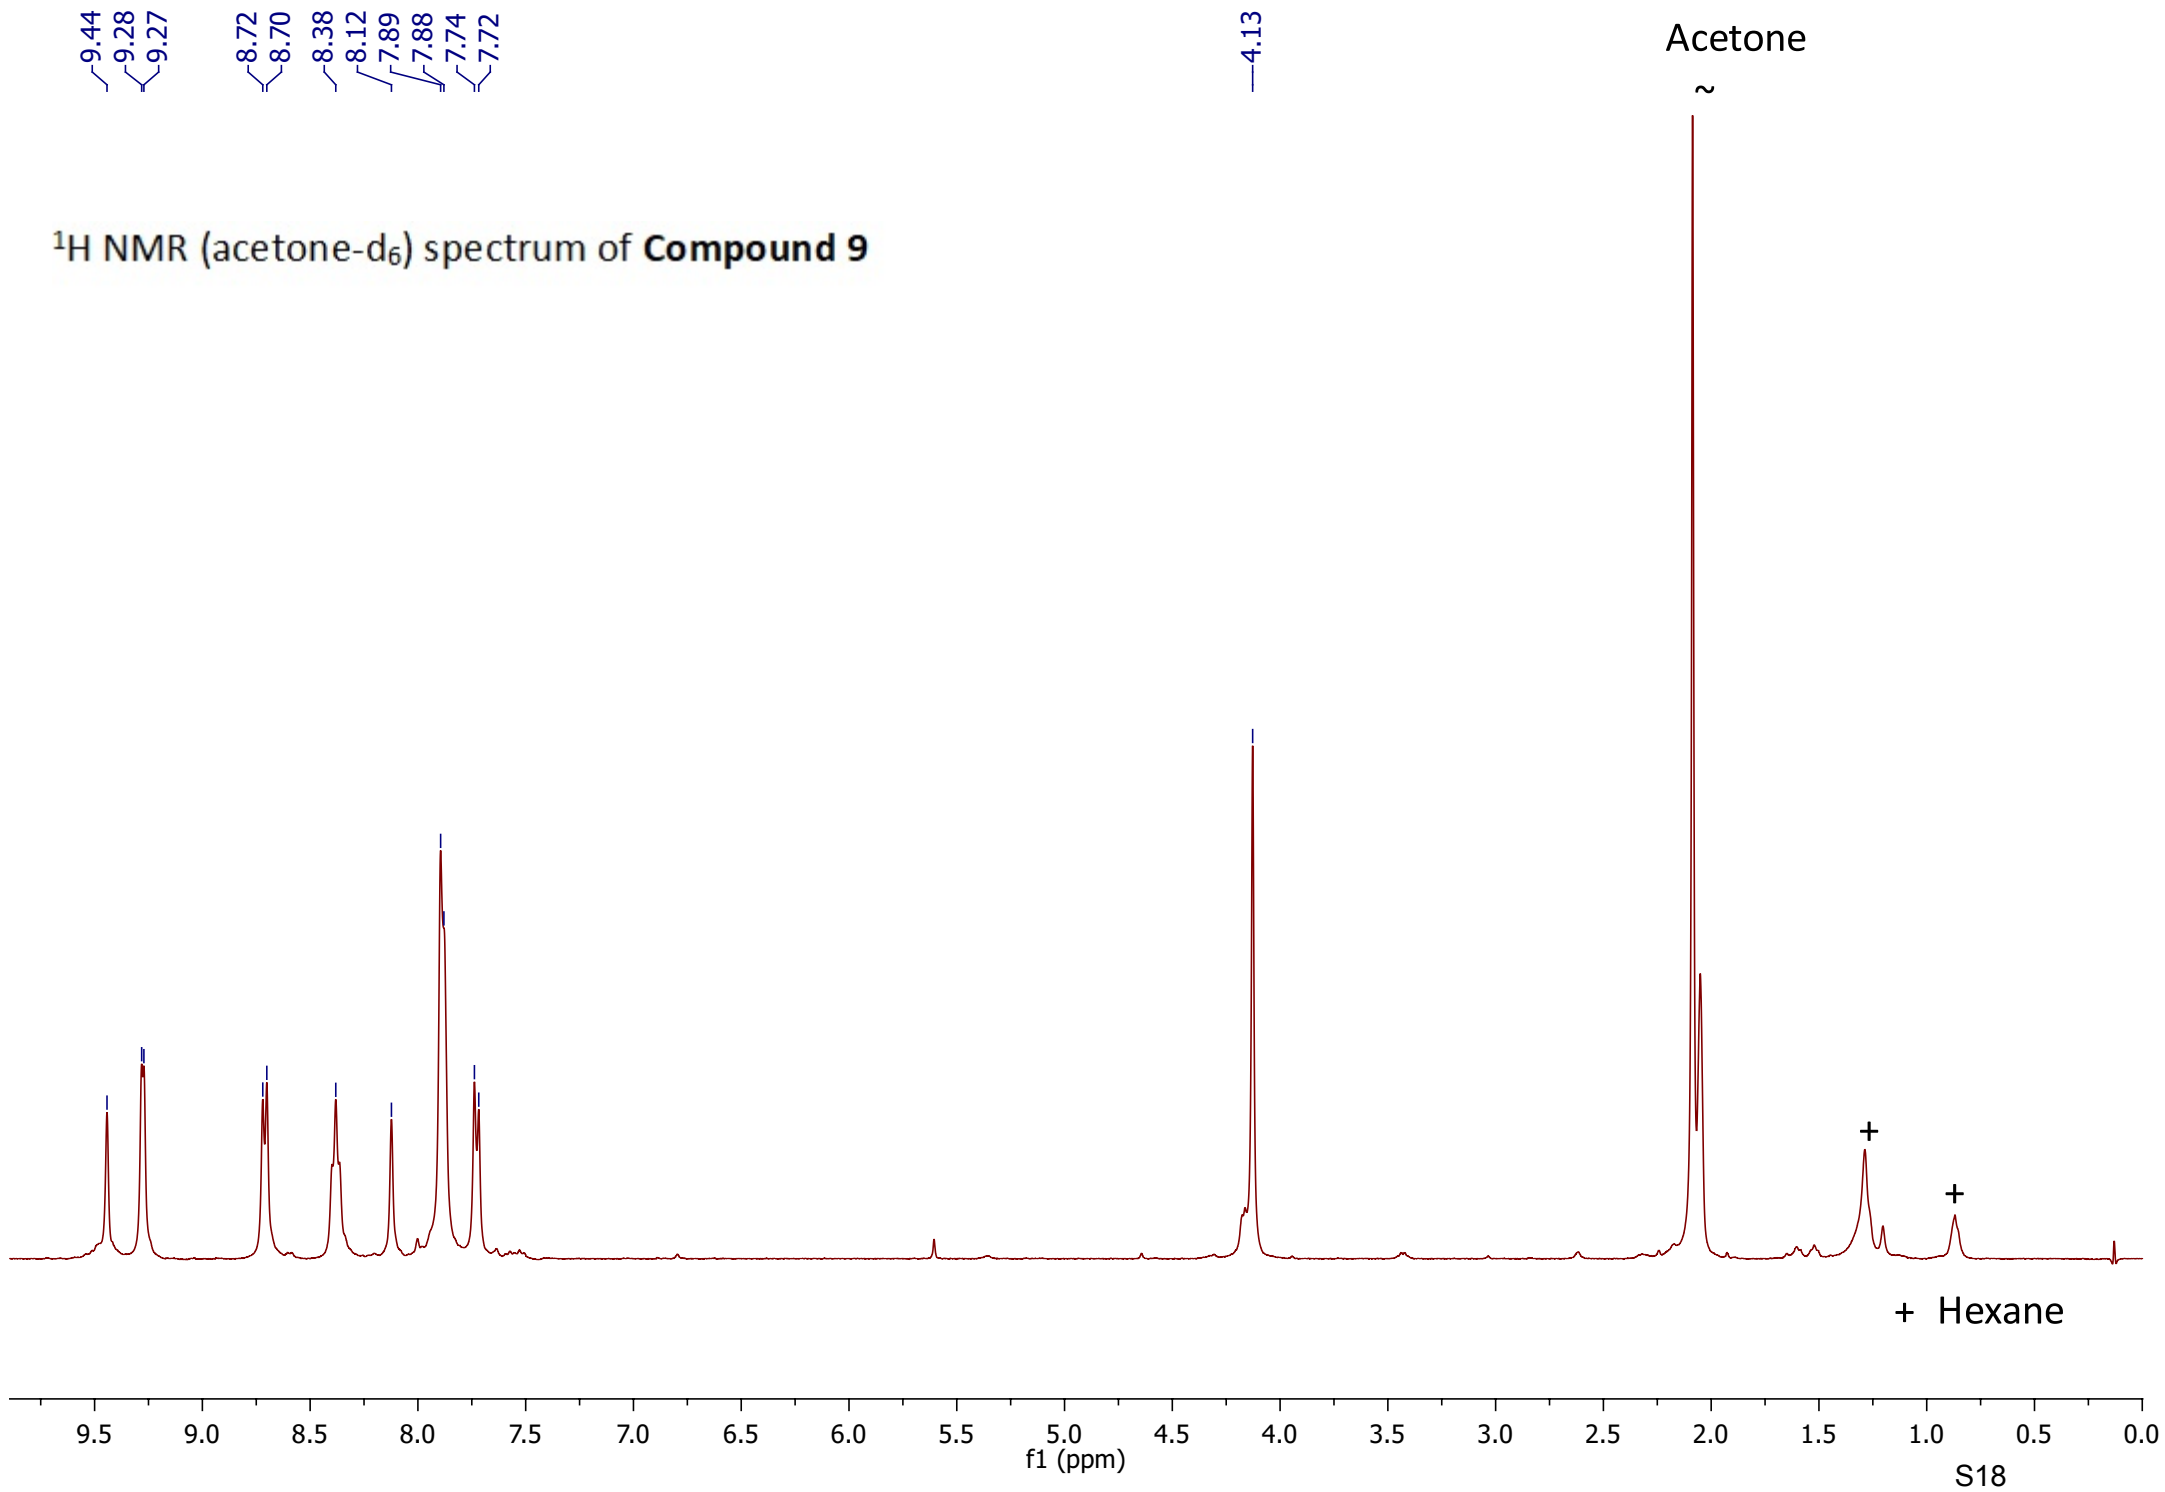

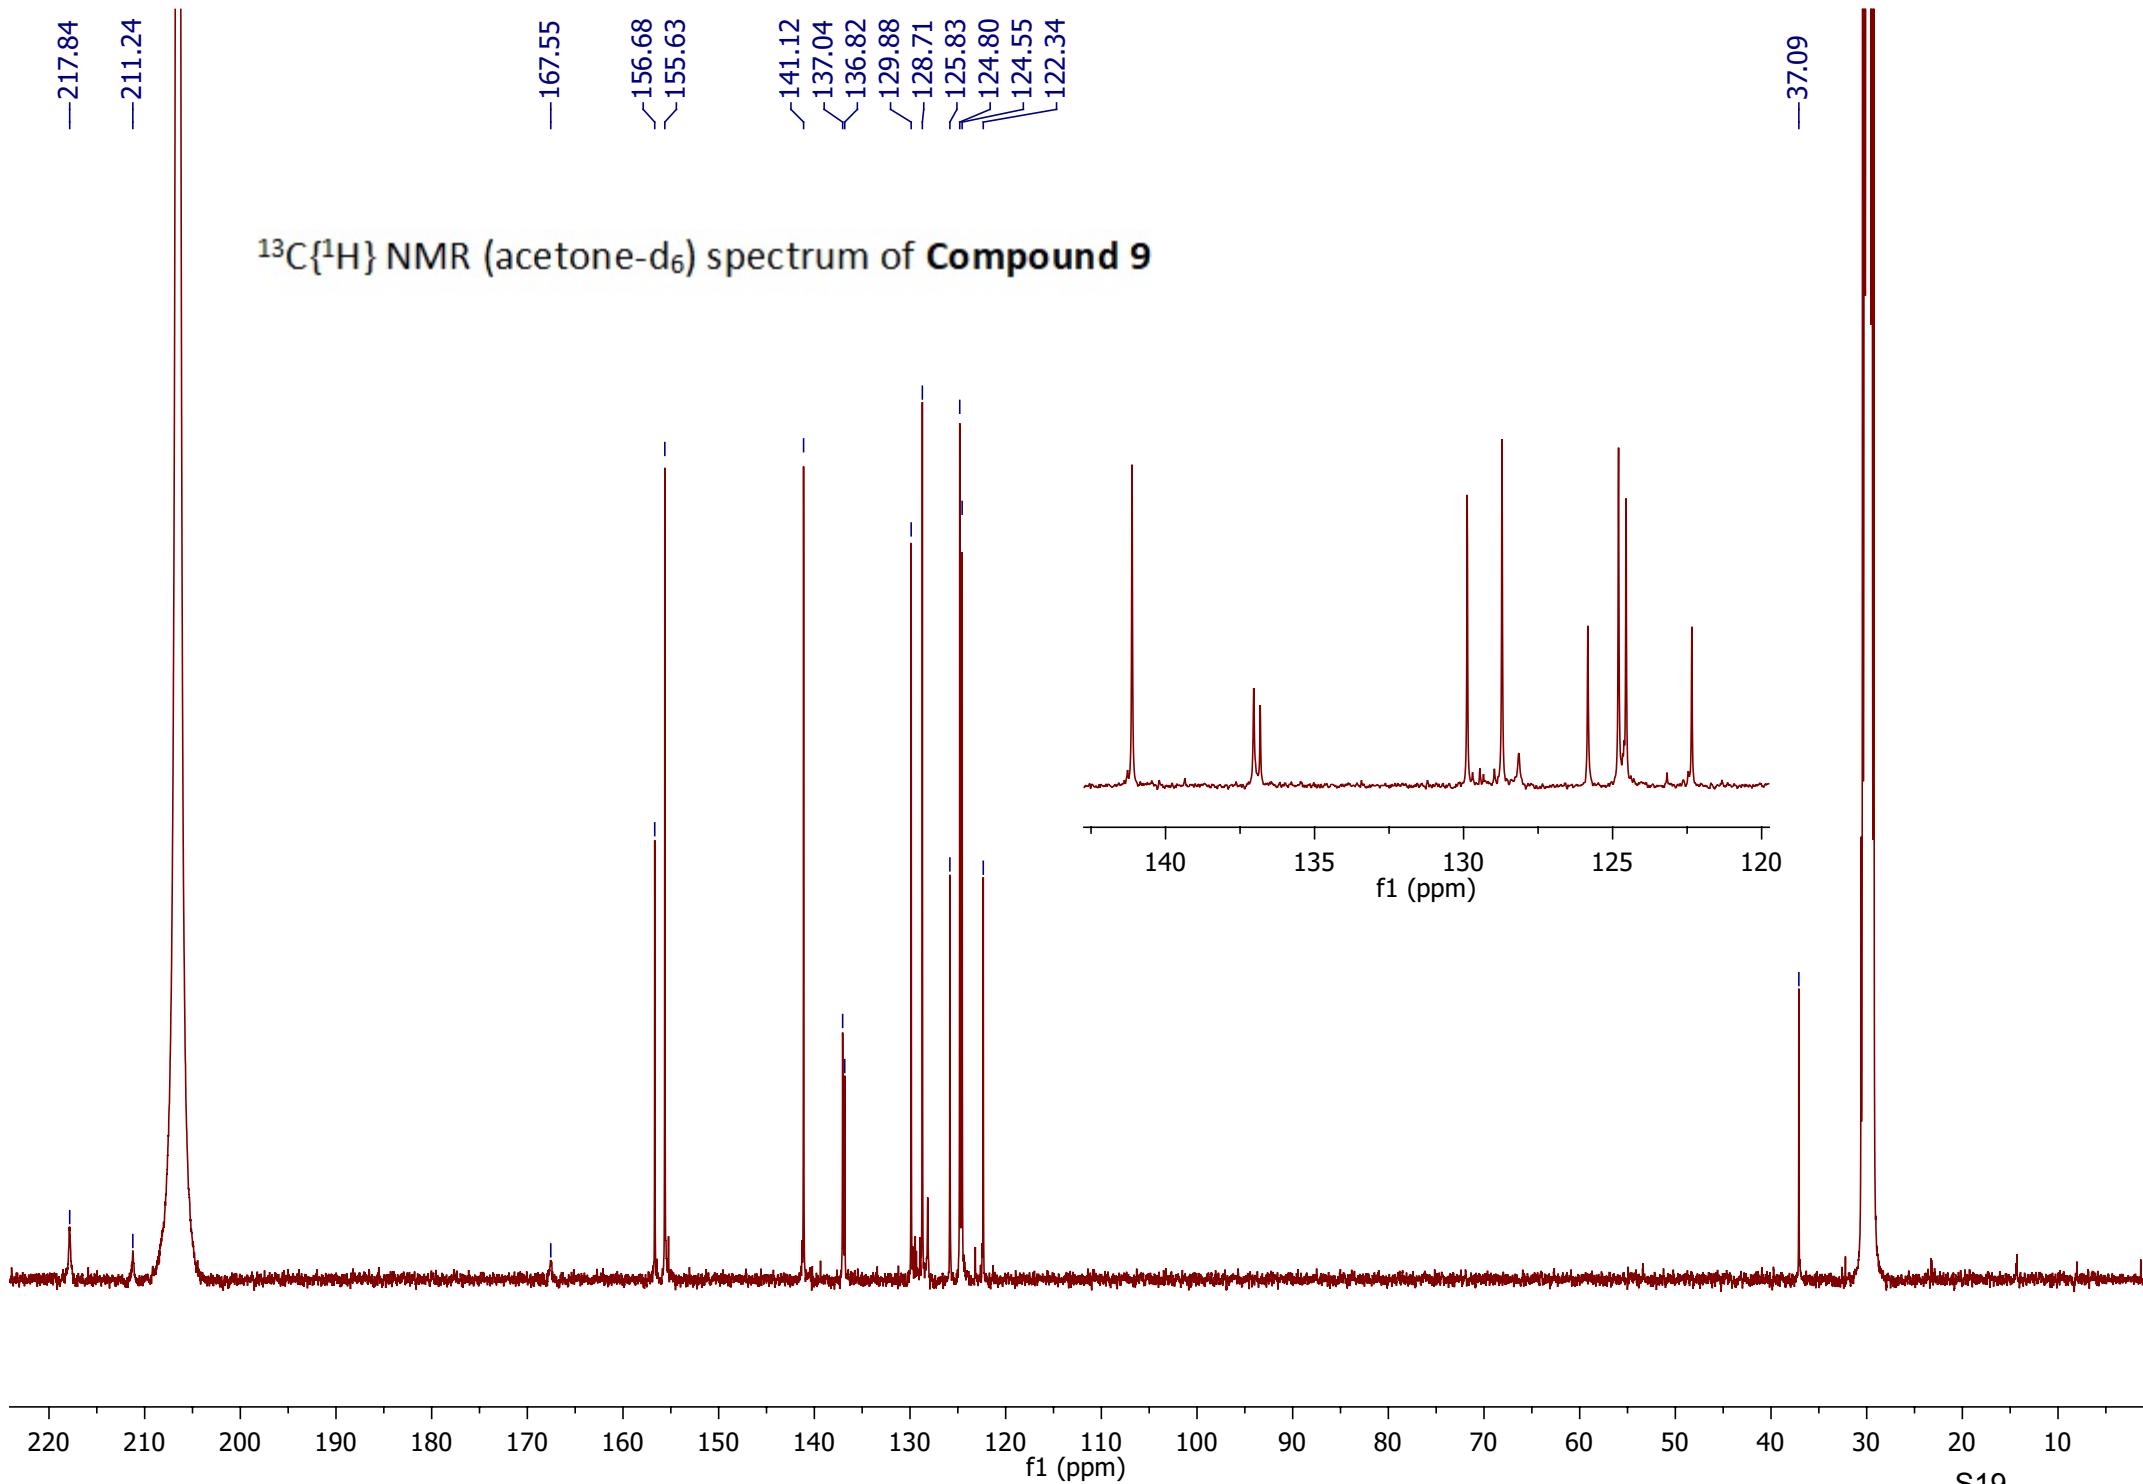

$^1\text{H}$  NMR (acetone- $\text{d}_6$ ) spectrum of **Compound 10**

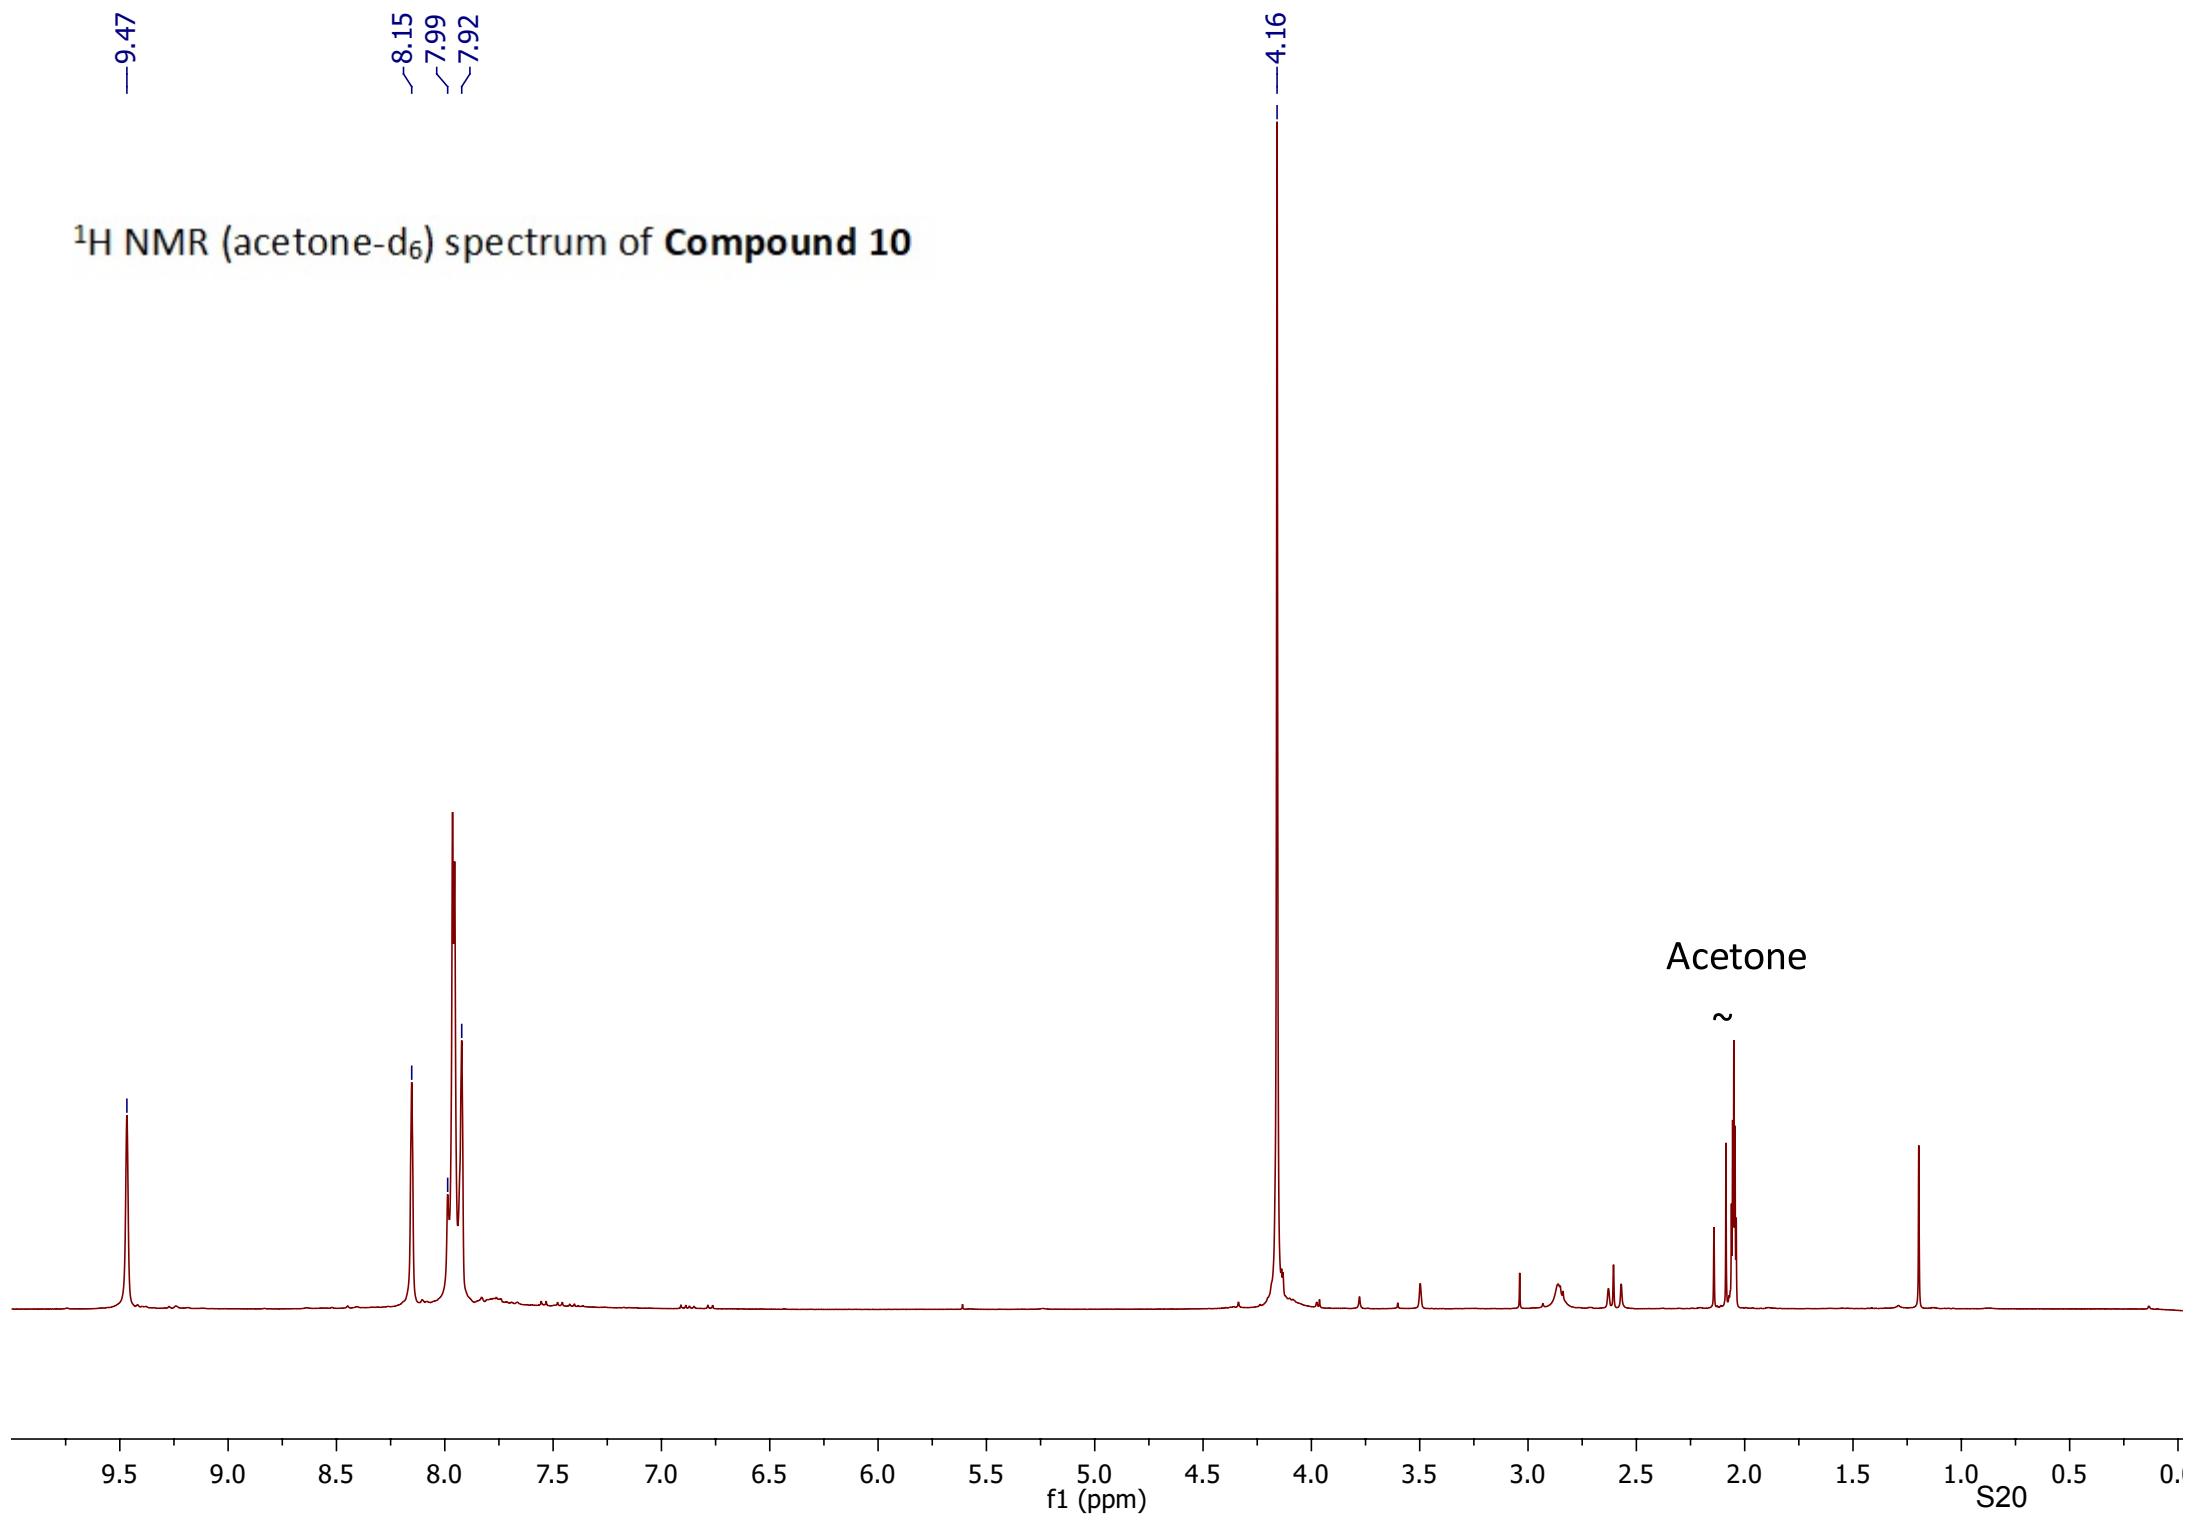

$^{13}\text{C}\{^1\text{H}\}$  NMR (acetone- $\text{d}_6$ ) spectrum of **Compound 10**

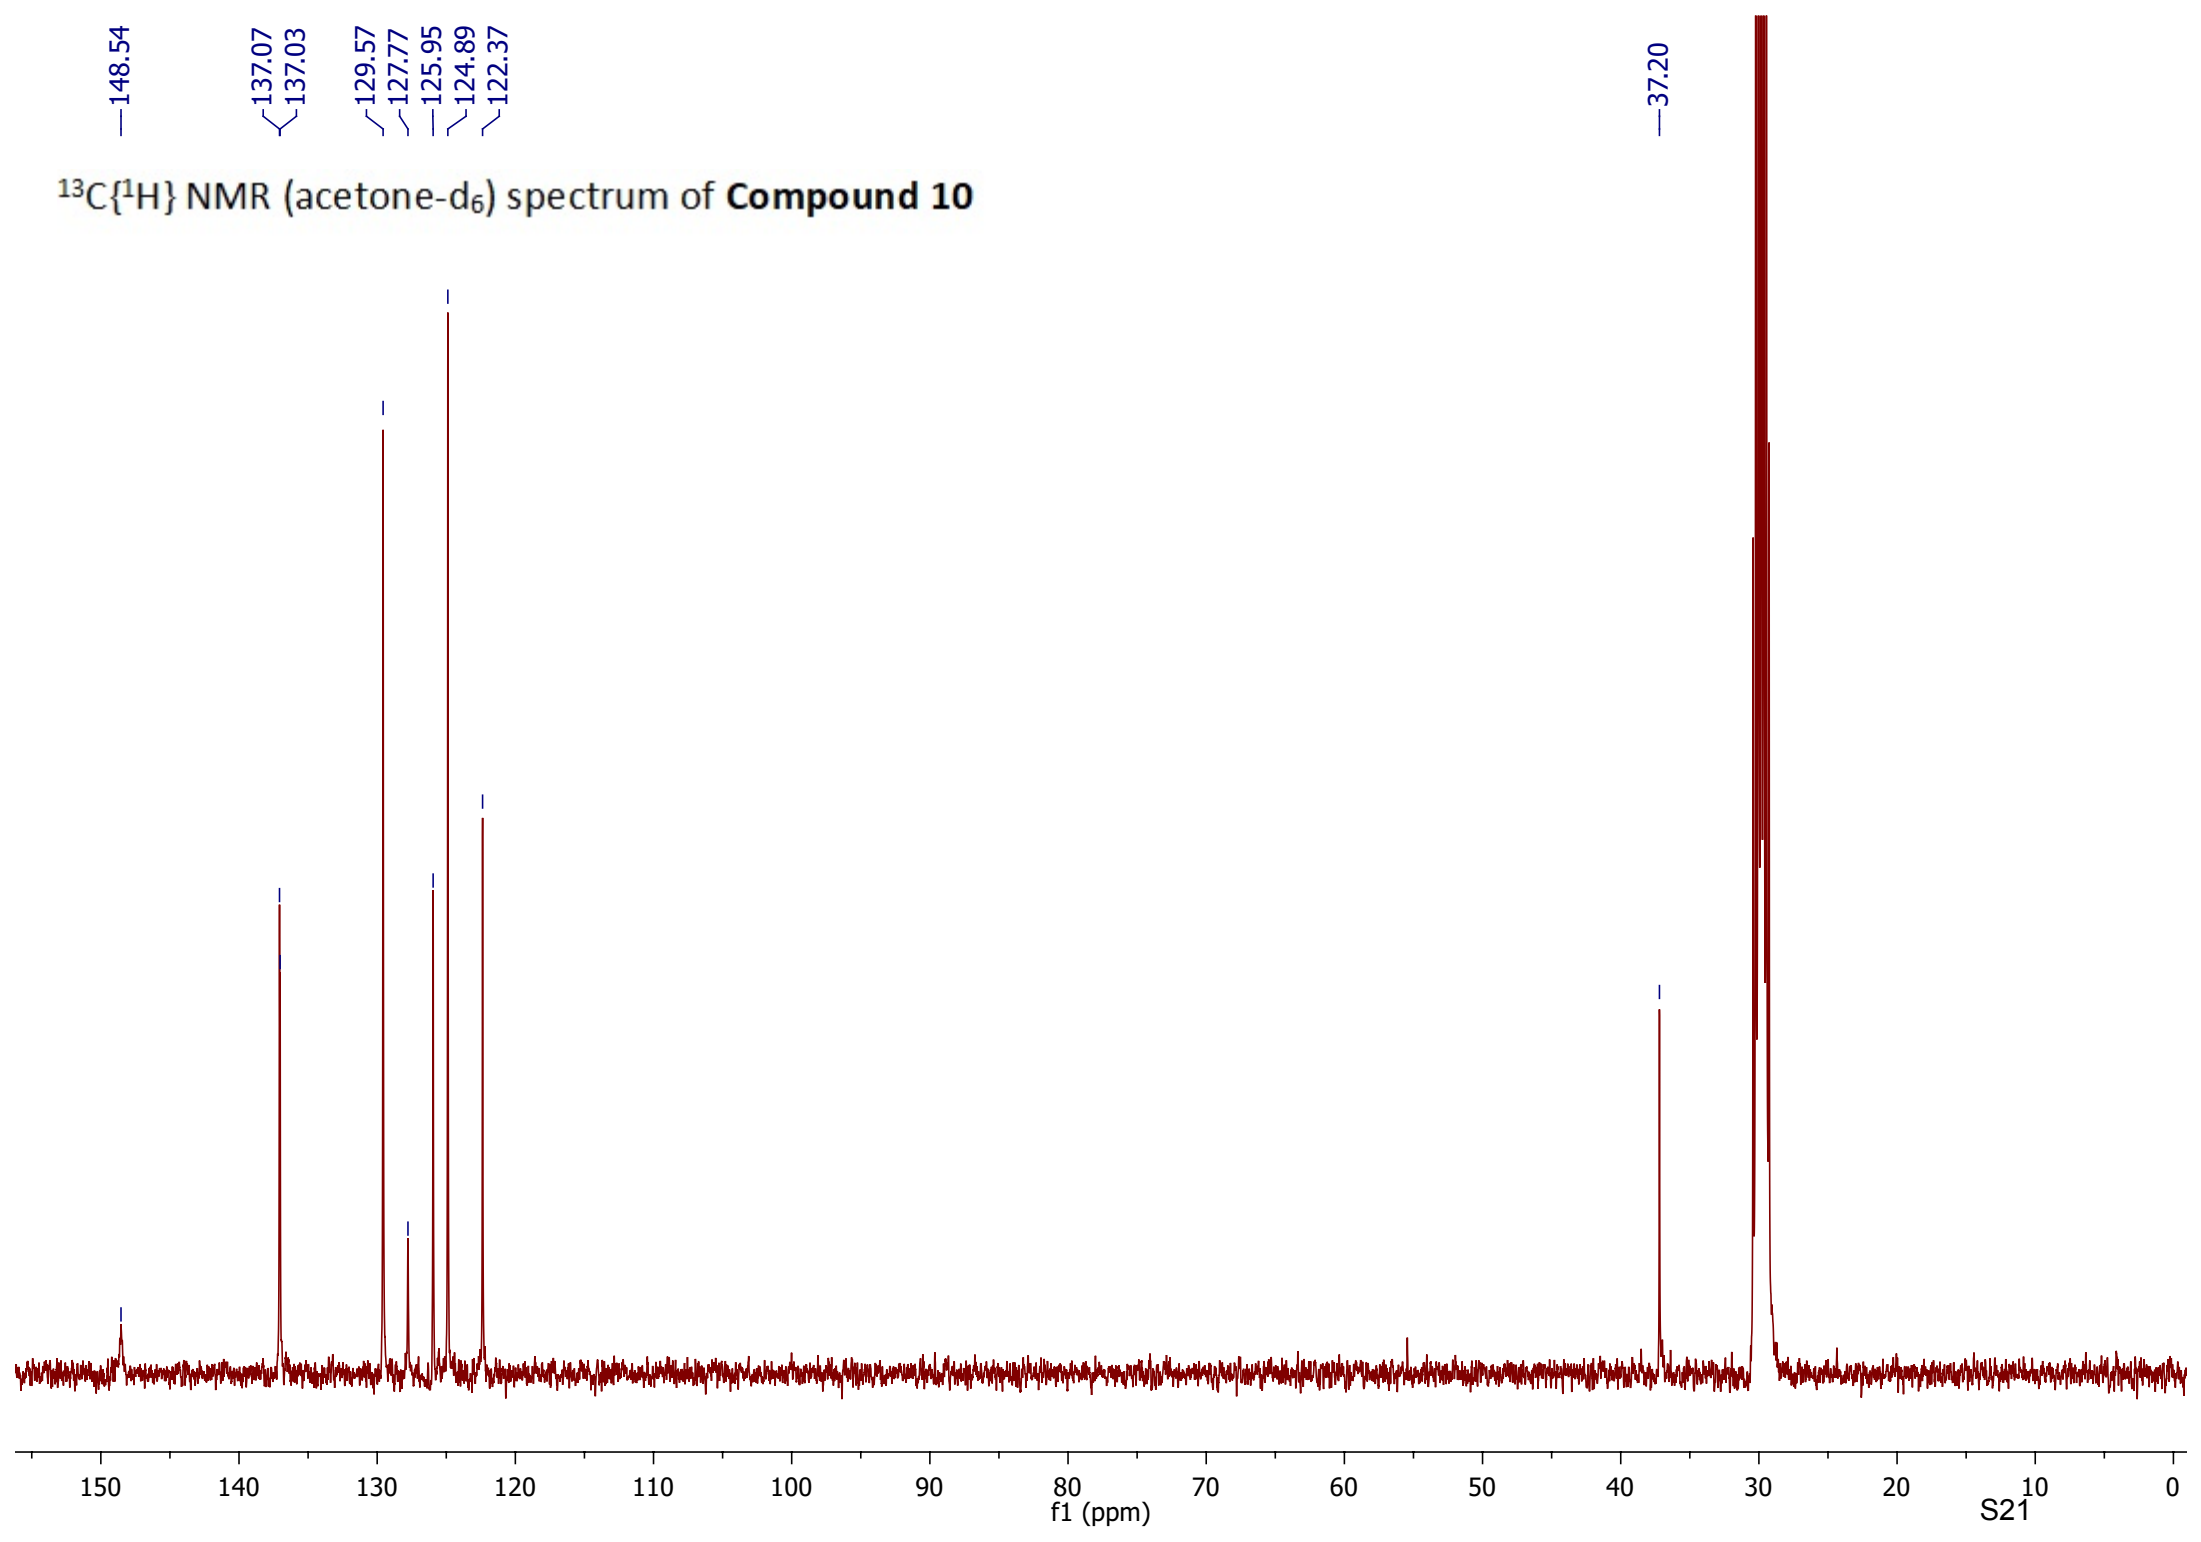

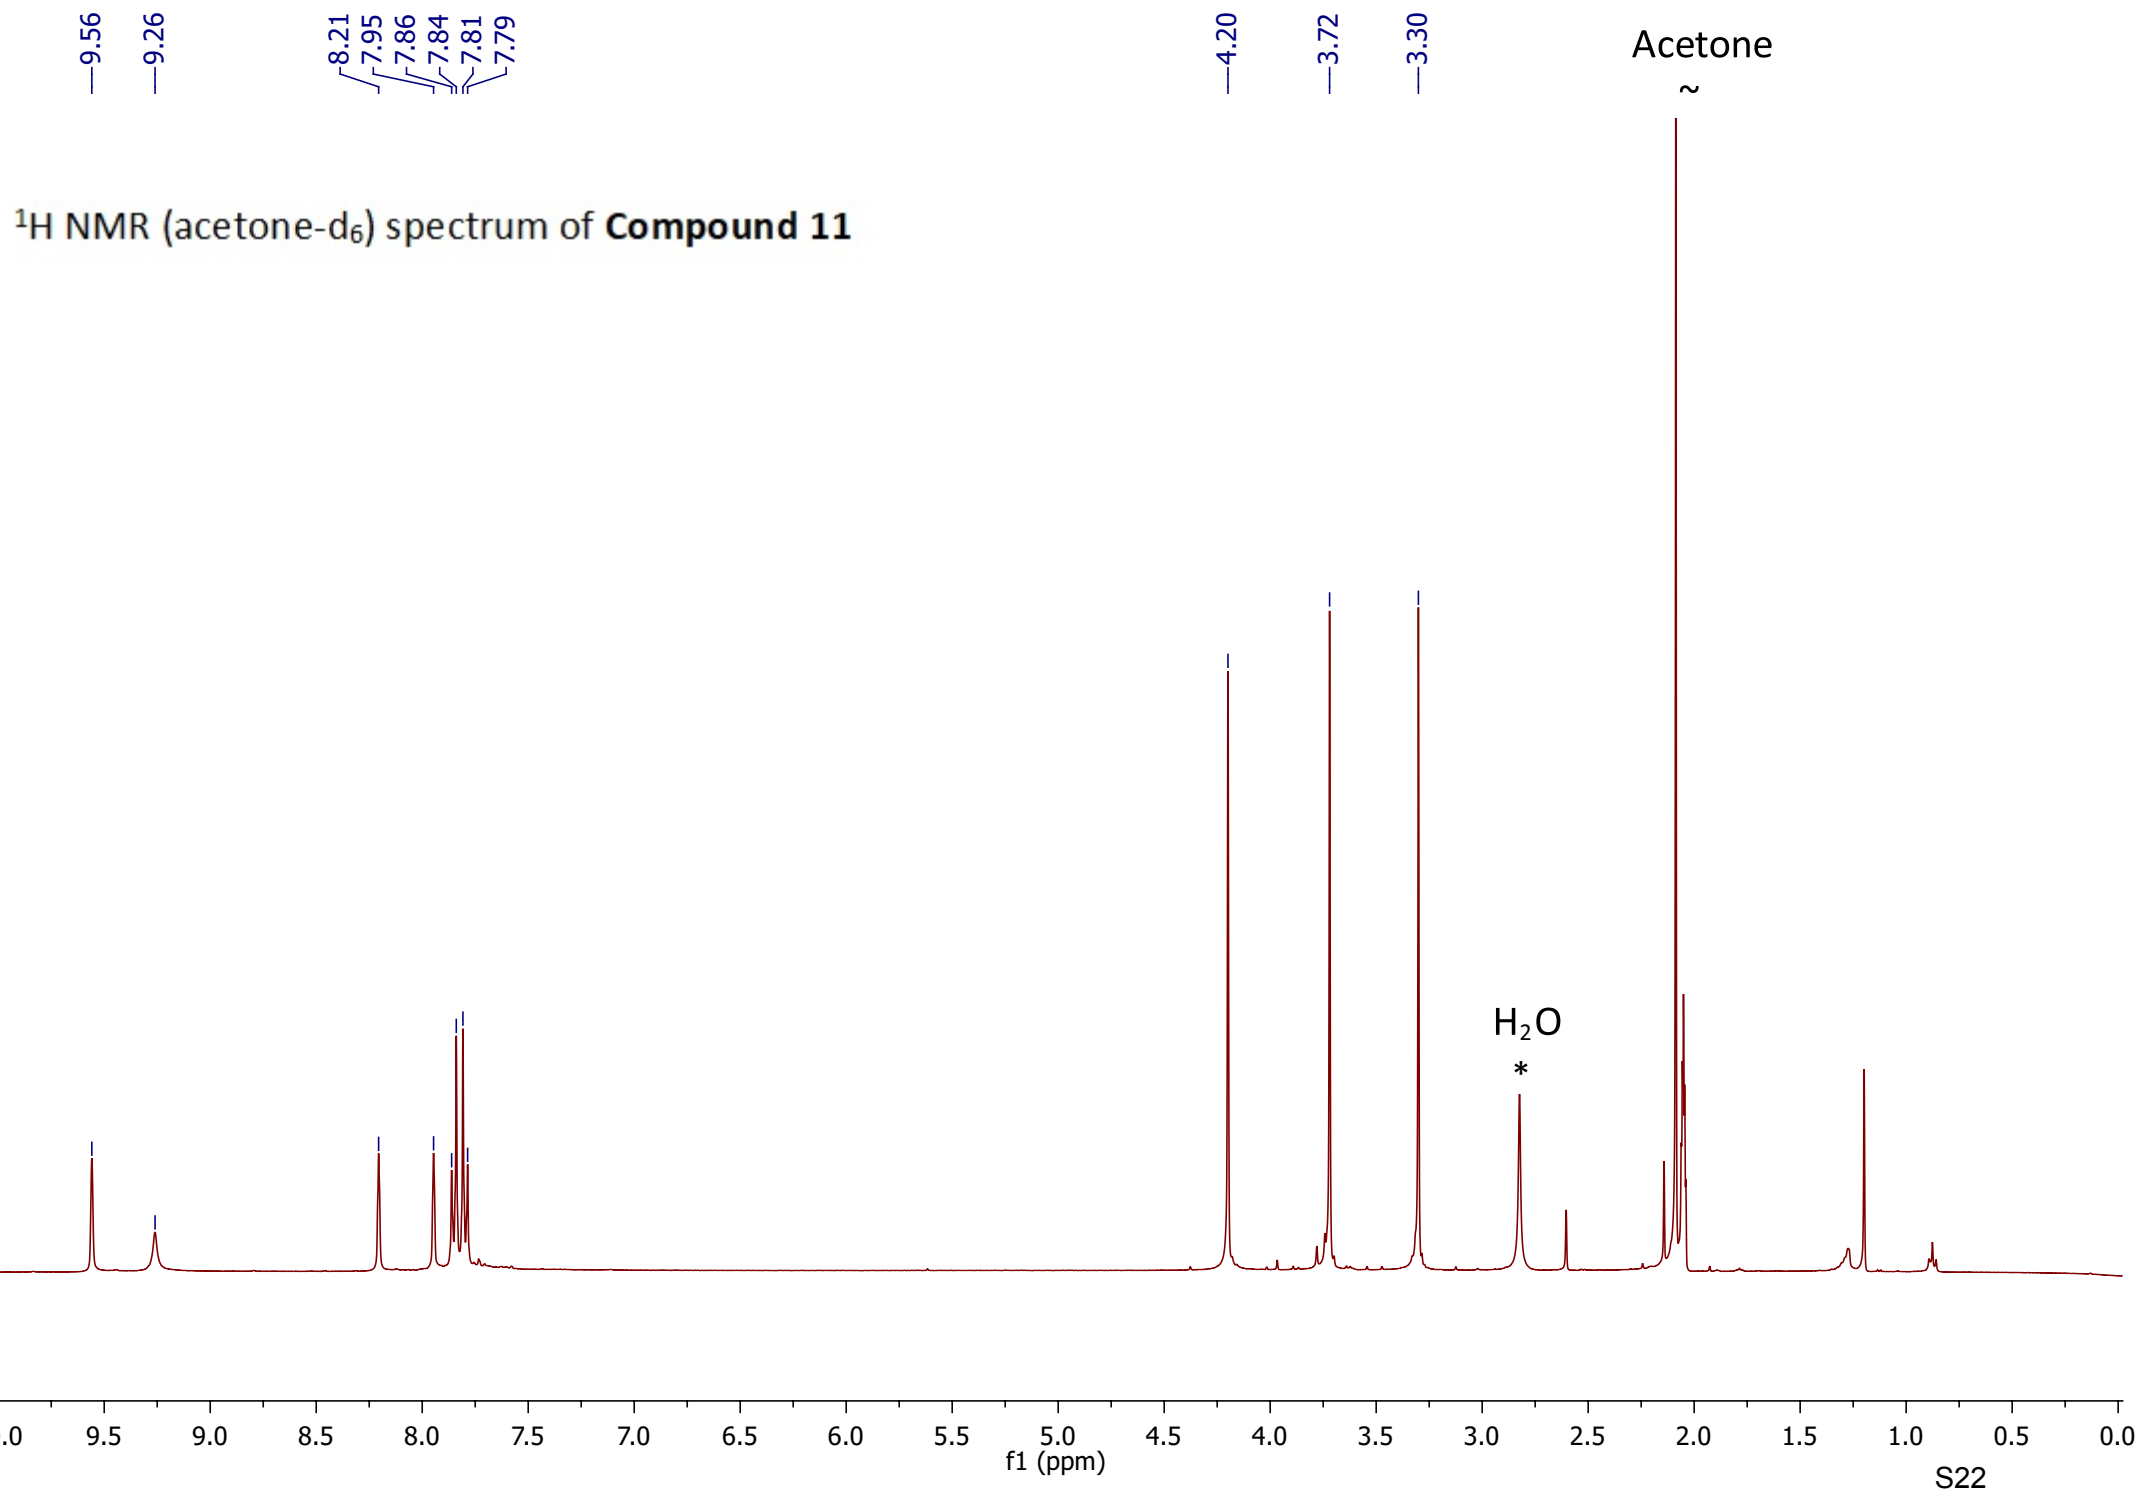

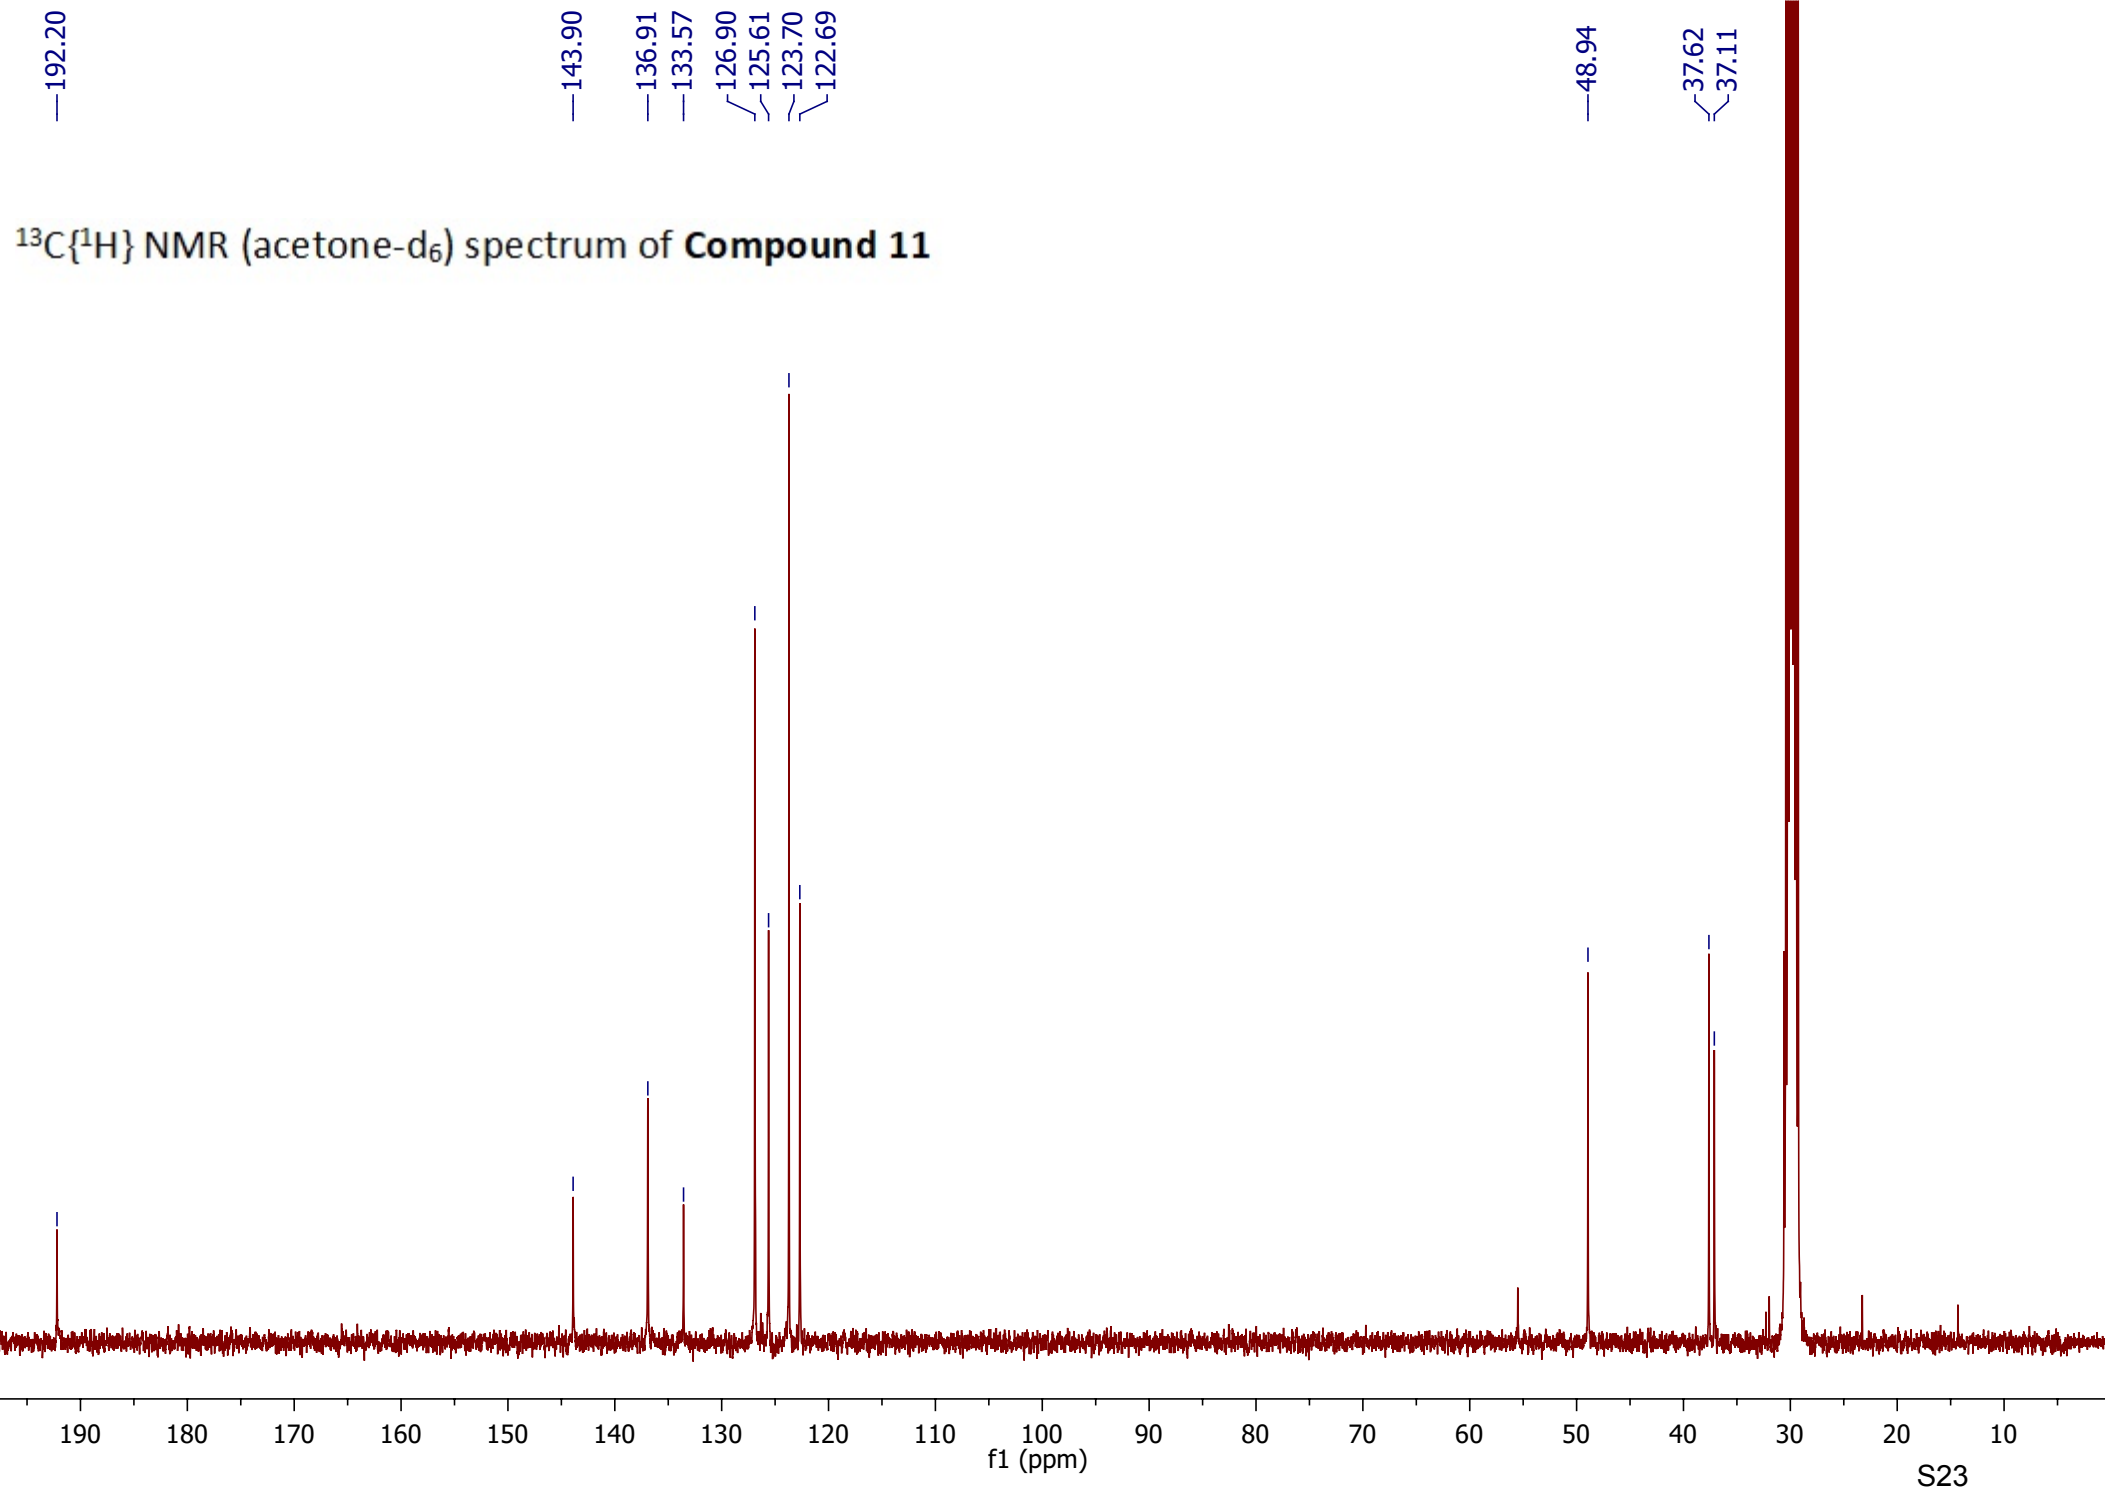

9.06  
9.04

8.41  
8.39  
8.24

7.75  
7.71  
7.42  
7.39  
7.27  
7.17

3.89

<sup>1</sup>H NMR (CD<sub>2</sub>Cl<sub>2</sub>) spectrum of **Compound 12**

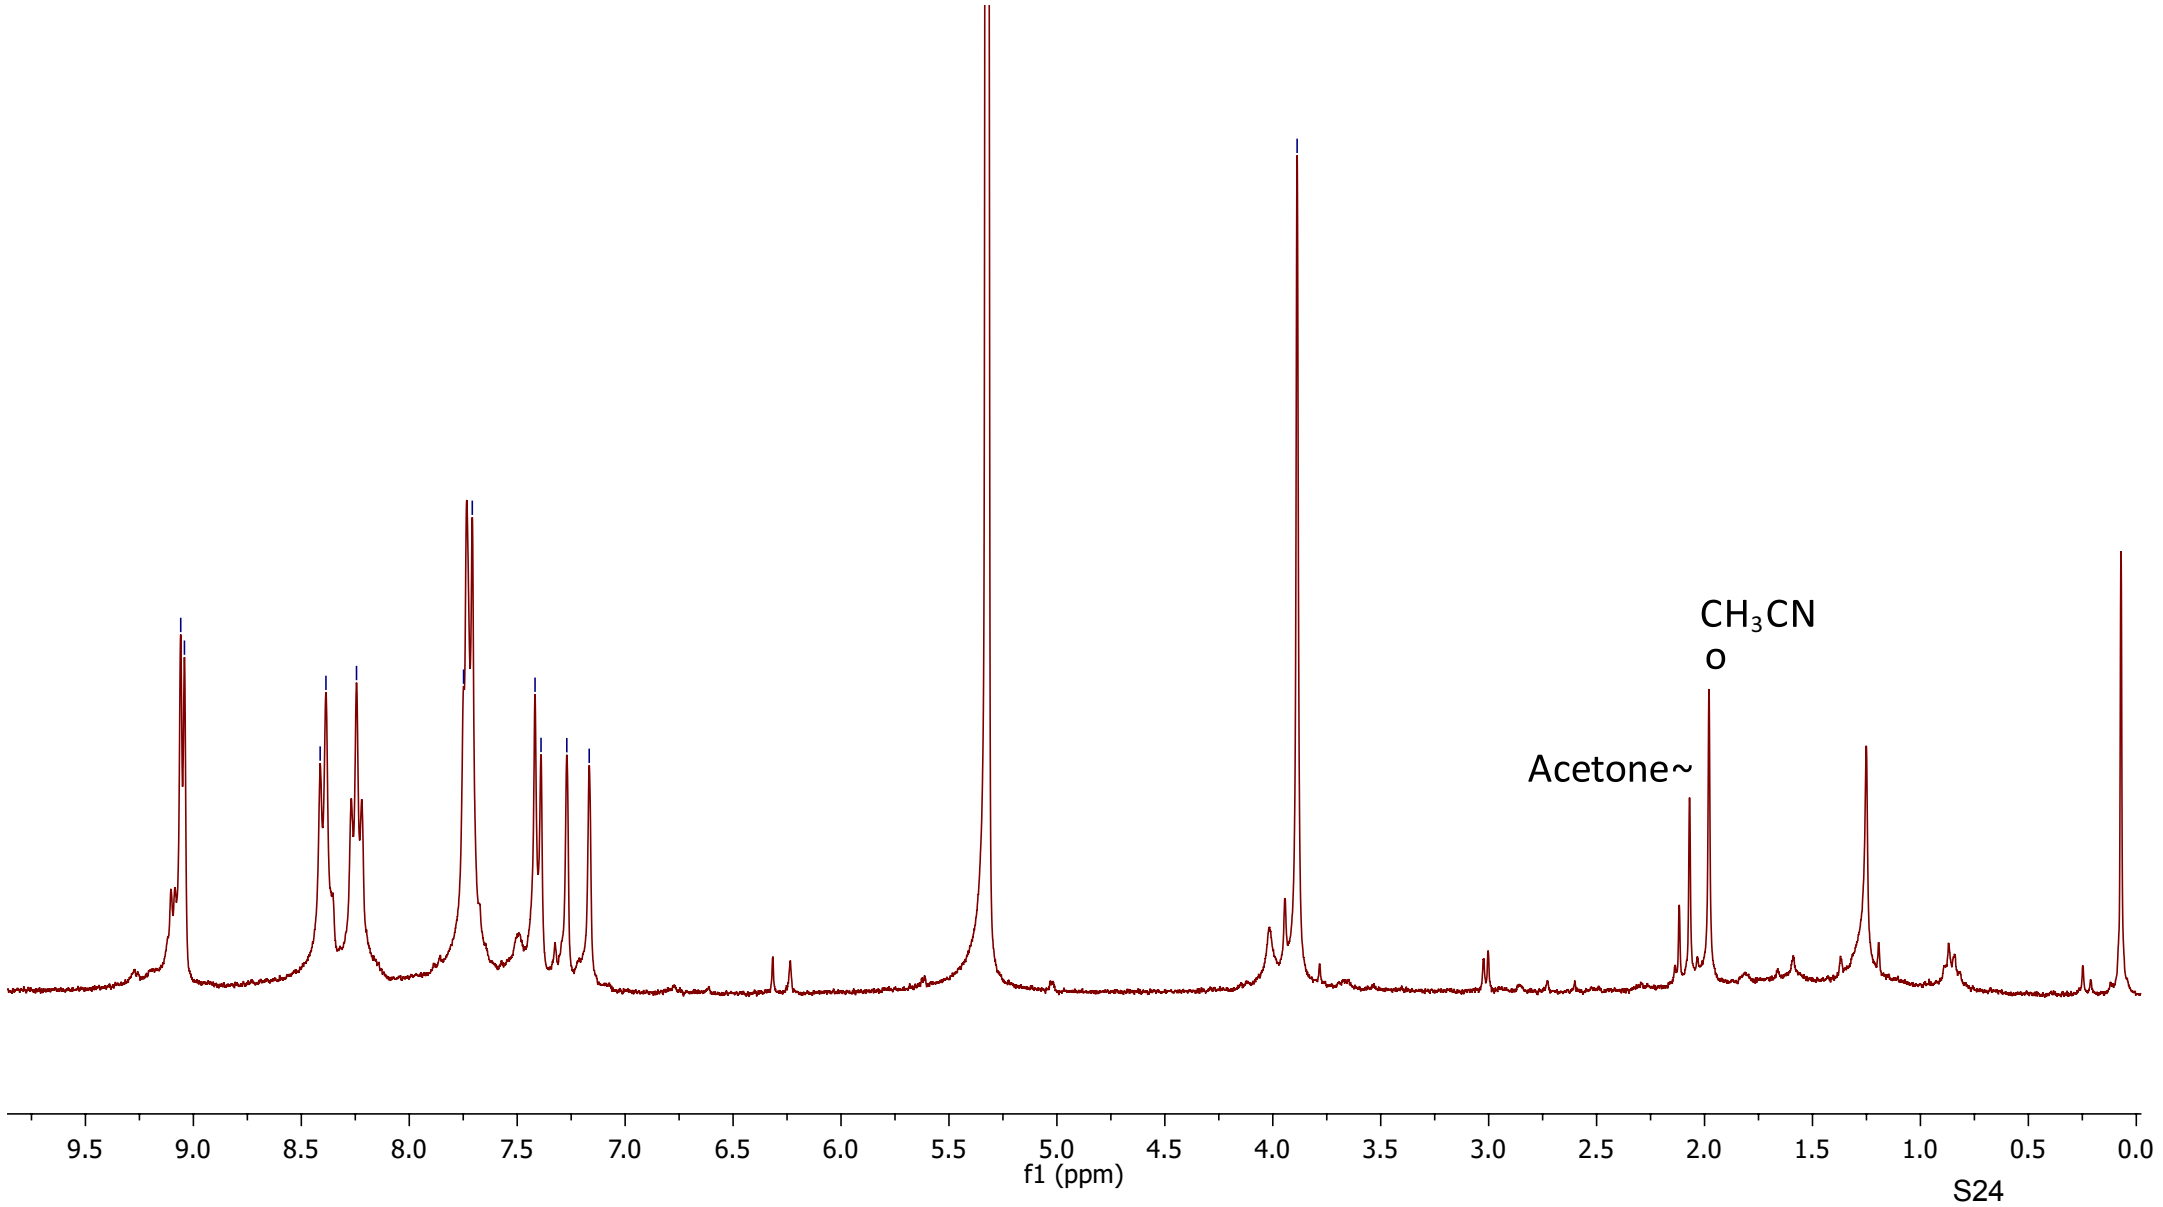

Supplement: d2dt02119f1.pdf [file d2dt02119f1.pdf]
